# Supplementary material for: Regioselective one-pot, three-component synthesis of substituted 2H-indazoles from 2-nitroarylaldehyde, alkyne and amine catalyzed by the CuBr/Zn(OTf)2 system
Source: Royal Society of Chemistry journal article supplement (doi:10.1039/c4ra10093j), 2014-01-01

## Supporting Information for Publication

# Regioselective One-Pot, Three-Component Synthesis of Substituted 2*H*-Indazoles from 2-Nitroarylaldehyde, Alkyne and Amine Catalyzed by CuBr/Zn(OTf)<sub>2</sub> System

Ramanjaneyulu Unnava,<sup>[a]</sup> Kiran Indukuri,<sup>[a]</sup> Sujit Sarkar,<sup>[a]</sup> and Anil K. Saikia\*<sup>[a]</sup>

### Contents:

|                                                                 |         |
|-----------------------------------------------------------------|---------|
| 1. General experimental Methods and spectroscopic data          | S2-S9   |
| 2. <sup>1</sup> H and <sup>13</sup> C Spectra of all compounds  | S10-S29 |
| 3. X-ray crystallographic data and ORTEP diagram of compound 4a | S30-31  |

**General experimental methods:** Solvents were distilled before use. All starting materials were used as received without further purification unless otherwise indicated. The combined organic layers were dried over Na<sub>2</sub>SO<sub>4</sub>. Solvents were evaporated under reduced pressure. All yields given refer to isolated yields. <sup>1</sup>H and <sup>13</sup>C NMR spectra were recorded in CDCl<sub>3</sub> on 600, 400 and 150, 100 MHz NMR spectrometer, respectively using TMS as internal standard. HRMS spectra were recorded using a TOF mass spectrometer. IR spectra were recorded either neat or as film on KBr pellets on a FT-IR spectrometer. Melting points were measured in open capillary tubes and are uncorrected. For thin-layer chromatography (TLC) silica gel GF<sub>254</sub> was used. Column chromatography was carried out using silica gel 60-120 mesh. X-ray analysis was done on single crystal X-ray diffractometer. All the reactions were performed under nitrogen atmosphere.

General procedure for the Synthesis of 2*H*-Indazoles: To a mixture of CuBr (30 mol%), *o*-nitrobenzaldehyde (0.5 mmol), and Zn(OTf)<sub>2</sub> (10 mol%) in 3 mL of dry toluene, amine (0.55 mmol) and alkyne (1.0mmol) were added by dissolving in 5 mL of toluene and the reaction mixture was refluxed for specified time. After completion of the reaction, the reaction was cooled, the solvent was removed under rotary evaporator, diluted with water and then extracted with ethyl acetate. The organic layer was further washed with brine solution for 2-3 times. The combined organic layers were dried over Na<sub>2</sub>SO<sub>4</sub> and concentrated in rotary evaporator. The crude was subjected to column chromatography over silica gel to give the corresponding product.

**2-(3,4-Dimethoxyphenethyl)-3-(phenylethynyl)-2*H*-indazole (4a):**

Red solid; mp 118-120 °C; R<sub>f</sub> (hexane/EtOAc 4:1) 0.52; yield 159 mg, 83%; <sup>1</sup>H NMR (400 MHz, CDCl<sub>3</sub>): δ 7.74 (t, *J* = 9.2 Hz, 2 H), 7.53 (s, 2 H), 7.40 (s, 3 H), 7.73 (t, *J* = 7.6 Hz, 1 H), 7.17 (t, *J* = 7.2 Hz, 1 H), 6.74 (s, 2 H), 6.43 (s, 1 H), 4.77 (t, *J* = 6.8 Hz, 2 H), 3.79 (s, 3 H), 3.56 (s, 3 H), 3.27 (t, *J* = 6.8 Hz, 2 H); <sup>13</sup>C NMR (100 MHz, CDCl<sub>3</sub>): δ 149.0, 148.2, 148.0, 131.6, 130.4, 129.2, 128.6, 126.7, 124.2, 122.8, 122.3, 120.9, 120.1, 119.1, 117.9, 112.0, 111.5, 100.3, 77.0, 55.9, 55.6, 53.6, 36.7; IR (KBr, neat) 2925, 2853, 1592, 1516, 1464, 1263, 1238, 1156, 1139, 1028, 751, 690 cm<sup>-1</sup>; HRMS (ESI) calcd. for C<sub>25</sub>H<sub>23</sub>N<sub>2</sub>O<sub>2</sub> (M + H)<sup>+</sup> 383.1754, found 383.1761.

**2-(3,4-Dimethoxyphenethyl)-6-nitro-3-(phenylethynyl)-2H-indazole (4b):**

Yellow solid; mp 160-162 °C;  $R_f$  (hexane/EtOAc 7:3) 0.50; yield 160 mg, 75%;  $^1\text{H}$  NMR (400 MHz,  $\text{CDCl}_3$ ):  $\delta$  8.75 (s, 1 H), 7.98 (d,  $J = 9.2$  Hz, 1 H), 7.84 (d,  $J = 9.2$  Hz, 1 H), 7.55 (d,  $J = 7.6$  Hz, 2 H), 7.43 (d,  $J = 5.6$  Hz, 3 H), 6.75-6.69 (m, 2 H), 6.48 (s, 1 H), 4.84 (t,  $J = 6.8$  Hz, 2 H), 3.80 (s, 3 H), 3.60 (s, 3 H), 3.31 (t,  $J = 7.2$  Hz, 2 H);  $^{13}\text{C}$  NMR (100 MHz,  $\text{CDCl}_3$ ):  $\delta$  149.2, 148.3, 147.3, 146.3, 131.8, 129.9, 129.8, 128.9, 126.4, 121.7, 121.6, 121.0, 120.7, 116.7, 116.0, 112.0, 111.7, 101.5, 75.7, 56.1, 55.8, 54.4, 36.6; IR (KBr, neat) 2923, 1561, 1529, 1519, 1503, 1346, 1267, 1235, 1159, 1029, 837, 754  $\text{cm}^{-1}$ ; HRMS (ESI) calcd. for  $\text{C}_{25}\text{H}_{22}\text{N}_3\text{O}_4$  ( $\text{M} + \text{H}$ )<sup>+</sup> 428.1605, found 428.1613.

**2-(3,4-Dimethoxyphenethyl)-3-(phenylethynyl)-6-(trifluoromethyl)-2H-indazole (4c):**

Pale yellow solid; mp 94-96 °C;  $R_f$  (hexane/EtOAc 7:3) 0.55; yield 178 mg, 79%;  $^1\text{H}$  NMR (400 MHz,  $\text{CDCl}_3$ ):  $\delta$  8.08 (s, 1 H), 7.83 (d,  $J = 8.4$  Hz, 1 H), 7.57-7.53 (m, 2 H), 7.42 (s, 3 H), 7.33 (d,  $J = 8.4$  Hz, 1 H), 6.75-6.70 (m, 2 H), 6.45 (s, 1 H), 4.81 (t,  $J = 6.8$  Hz, 2 H), 3.80 (s, 3 H), 3.58 (s, 3 H), 3.29 (t,  $J = 6.8$  Hz, 2 H);  $^{13}\text{C}$  NMR (150 MHz,  $\text{CDCl}_3$ ):  $\delta$  149.2, 148.2, 146.7, 131.7, 130.1, 129.6, 129.1 (q,  $J = 33.0$  Hz), 128.8, 125.2, 124.6 (q,  $J = 271.5$  Hz), 122.0, 121.5, 121.0, 120.0, 118.6, 116.5 (q,  $J = 4.5$  Hz), 112.0, 111.6, 101.0, 76.2, 56.0, 55.7, 54.0, 36.7;  $^{19}\text{F}$  NMR (376 MHz,  $\text{C}_6\text{F}_6/\text{CDCl}_3$ ):  $\delta$  99.44. IR (KBr, neat) 2934, 2202, 1516, 1463, 1337, 1253, 1160, 1121, 1045, 808, 755, 688  $\text{cm}^{-1}$ ; HRMS (ESI) calcd. for  $\text{C}_{26}\text{H}_{22}\text{F}_3\text{N}_2\text{O}_2$  ( $\text{M} + \text{H}$ )<sup>+</sup> 451.1628, found 451.1628.

**5-Chloro-2-(3,4-dimethoxyphenethyl)-3-(phenylethynyl)-2H-indazole (4d):**

Pale yellow solid; mp 83-85 °C;  $R_f$  (hexane/EtOAc 4:1) 0.51; yield 148 mg, 71%;  $^1\text{H}$  NMR (400 MHz,  $\text{CDCl}_3$ ):  $\delta$  7.71 (s, 1 H), 7.68 (d,  $J = 9.2$  Hz, 1 H), 7.54-7.51 (m, 2 H), 7.43-7.39 (m, 3 H), 7.28-7.24 (m, 1 H), 6.75-6.69 (m, 2 H), 6.46 (s, 1 H), 4.75 (t,  $J = 7.2$  Hz, 2 H), 3.80 (s, 3 H), 3.59 (s, 3 H), 3.27 (t,  $J = 7.2$  Hz, 2 H);  $^{13}\text{C}$  NMR (100 MHz,  $\text{CDCl}_3$ ):  $\delta$  149.5, 148.5, 146.9, 132.0, 130.5, 130.0, 129.8, 129.1, 128.4, 124.9, 122.4, 121.3, 119.8, 119.4, 119.3, 112.3, 112.0, 101.1, 76.7, 56.3, 56.0, 54.1, 37.0; IR (KBr, neat) 2932, 2834, 1515, 1463, 1327, 1263, 1237,

1157, 1028, 804, 756, 690  $\text{cm}^{-1}$ ; HRMS (ESI) calcd. for  $\text{C}_{25}\text{H}_{22}\text{ClN}_2\text{O}_2$  ( $\text{M} + \text{H}$ )<sup>+</sup> 417.1364, found 417.1366.

**5-(Benzyloxy)-2-(3,4-dimethoxyphenethyl)-3-(phenylethynyl)-2H-indazole (4e):**

Pale yellow semisolid;  $R_f$  (hexane/EtOAc 4:1) 0.51; yield 73 mg, 30%;  $^1\text{H}$  NMR (400 MHz,  $\text{CDCl}_3$ ):  $\delta$  7.66 (d,  $J = 9.2$  Hz, 1 H), 7.56–7.53 (m, 2 H), 7.49 (d,  $J = 7.2$  Hz, 2 H), 7.43–7.34 (m, 6 H), 7.11 (d,  $J = 8.8$  Hz, 1 H), 7.04 (s, 1 H), 6.75 (s, 2 H), 6.45 (s, 1 H), 5.11 (s, 2 H), 4.73 (t,  $J = 7.6$  Hz, 2 H), 3.81 (s, 3 H), 3.58 (s, 3 H), 3.26 (t,  $J = 7.2$  Hz, 2 H);  $^{13}\text{C}$  NMR (150 MHz,  $\text{CDCl}_3$ ):  $\delta$  155.5, 149.2, 148.1, 145.0, 137.1, 131.7, 130.6, 129.2, 128.8, 128.7, 128.2, 127.9, 124.5, 122.6, 121.7, 121.0, 119.5, 118.4, 112.2, 111.6, 100.3, 98.3, 77.4, 70.6, 56.1, 55.7, 53.6, 36.8; IR (KBr, neat) 2925, 2850, 1633, 1516, 1464, 1262, 1236, 1189, 1027, 807, 756  $\text{cm}^{-1}$ ; HRMS (ESI) calcd. for  $\text{C}_{32}\text{H}_{29}\text{N}_2\text{O}_3$  ( $\text{M} + \text{H}$ )<sup>+</sup> 489.2173, found 489.2171.

**2-(3,4-Dimethoxyphenethyl)-3-(phenylethynyl)-2H-indazol-5-yl acetate (4f):**

Pale yellow semisolid;  $R_f$  (hexane/EtOAc 7:3) 0.54; yield 77 mg, 35%;  $^1\text{H}$  NMR (400 MHz,  $\text{CDCl}_3$ ):  $\delta$  7.75 (d,  $J = 9.2$  Hz, 1 H), 7.54–7.51 (m, 2 H), 7.45–7.38 (m, 4 H), 7.06 (d,  $J = 8.8$  Hz, 1 H), 6.76–6.72 (m, 2 H), 6.48 (s, 1 H), 4.77 (t,  $J = 7.2$  Hz, 2 H), 3.80 (s, 3 H), 3.61 (s, 3 H), 3.27 (t,  $J = 7.6$  Hz, 2 H), 2.34 (s, 3 H);  $^{13}\text{C}$  NMR (150 MHz,  $\text{CDCl}_3$ ):  $\delta$  170.1, 149.2, 148.2, 146.5, 146.4, 131.7, 130.3, 129.4, 128.8, 123.9, 122.8, 122.3, 121.0, 119.8, 119.3, 112.1, 111.6, 111.2, 100.8, 76.7, 56.1, 55.8, 53.9, 36.8, 21.3; IR (KBr, neat) 2921, 2851, 1757, 1655, 1516, 1465, 1261, 1208, 1158, 1028, 806, 757, 668  $\text{cm}^{-1}$ ; HRMS (ESI) calcd. for  $\text{C}_{27}\text{H}_{25}\text{N}_2\text{O}_4$  ( $\text{M} + \text{H}$ )<sup>+</sup> 441.1809, found 441.1811.

**2-(3,4-Dimethoxyphenethyl)-3-(*p*-tolylethynyl)-2H-indazole (4g):**

Red solid; mp 74–76  $^\circ\text{C}$ ;  $R_f$  (hexane/EtOAc 4:1) 0.55; yield 119 mg, 60%;  $^1\text{H}$  NMR (400 MHz,  $\text{CDCl}_3$ ):  $\delta$  7.72 (t,  $J = 7.6$  Hz, 2 H), 7.41 (d,  $J = 7.6$  Hz, 2 H), 7.31 (t,  $J = 8.0$  Hz, 1 H), 7.19 (d,  $J = 8.0$  Hz, 2 H), 7.14 (t,  $J = 7.2$  Hz, 1 H), 6.73 (s, 2 H), 6.43 (s, 1 H), 4.75 (t,  $J = 7.2$  Hz, 2 H), 3.79 (s, 3 H), 3.55 (s, 3 H), 3.25 (t,  $J = 7.2$  Hz, 2 H), 2.39 (s, 3 H);  $^{13}\text{C}$  NMR (100 MHz,  $\text{CDCl}_3$ ):  $\delta$  149.1, 148.2, 148.0, 139.6, 131.6, 130.5, 129.5, 126.7, 124.1, 122.7, 121.0, 120.2, 119.4, 119.3,

117.9, 112.0, 111.5, 100.6, 76.4, 56.0, 55.7, 53.6, 36.7, 21.8; IR (KBr, neat) 2925, 2853, 1625, 1515, 1464, 1263, 1238, 1139, 1028, 815, 748  $\text{cm}^{-1}$ ; HRMS (ESI) calcd. for  $\text{C}_{26}\text{H}_{25}\text{N}_2\text{O}_2$  ( $\text{M} + \text{H}$ )<sup>+</sup> 397.1911, found 397.1915.

**3-((4-(*tert*-Butyl)phenyl)ethynyl)-2-(3,4-dimethoxyphenethyl)-2H-indazole (4h):**

Pale yellow semisolid;  $R_f$  (hexane/EtOAc 4:1) 0.56; yield 125 mg, 57%;  $^1\text{H}$  NMR (600 MHz,  $\text{CDCl}_3$ ):  $\delta$  7.76-7.71 (m, 2 H), 7.48 (d,  $J = 7.8$  Hz, 2 H), 7.42 (d,  $J = 7.8$  Hz, 2 H), 7.33 (t,  $J = 7.8$  Hz, 1 H), 7.16 (t,  $J = 7.2$  Hz, 1 H), 6.75 (s, 2 H), 6.48 (s, 1 H), 4.77 (t,  $J = 7.8$  Hz, 2 H), 3.81 (s, 3 H), 3.58 (s, 3 H), 3.28 (t,  $J = 7.2$  Hz, 2 H), 1.35 (s, 9 H);  $^{13}\text{C}$  NMR (150 MHz,  $\text{CDCl}_3$ ):  $\delta$  152.9, 149.2, 148.3, 148.1, 131.5, 130.5, 126.8, 125.8, 124.2, 122.8, 121.0, 120.2, 119.5, 119.5, 118.0, 112.1, 111.6, 100.7, 76.5, 56.1, 55.7, 53.7, 36.8, 35.2, 31.4 (3C); IR (KBr, neat) 2920, 1630, 1516, 1464, 1263, 1028, 747, 600  $\text{cm}^{-1}$ ; HRMS (ESI) calcd. for  $\text{C}_{29}\text{H}_{31}\text{N}_2\text{O}_2$  ( $\text{M} + \text{H}$ )<sup>+</sup> 439.2380, found 439.2385.

**3-((4-Chlorophenyl)ethynyl)-2-(3,4-dimethoxyphenethyl)-2H-indazole (4i):**

Colorless solid; mp 112-114 $^\circ\text{C}$ ;  $R_f$  (hexane/EtOAc 4:1) 0.52; yield 129 mg, 62%;  $^1\text{H}$  NMR (400 MHz,  $\text{CDCl}_3$ ):  $\delta$  7.76 (d,  $J = 9.2$  Hz, 1 H), 7.70 (d,  $J = 8.4$  Hz, 1 H), 7.44 (d,  $J = 8.8$  Hz, 2 H), 7.39-7.32 (m, 3 H), 7.17 (t,  $J = 6.8$  Hz, 1 H), 6.75-6.70 (m, 2 H), 6.38 (s, 1 H), 4.76 (t,  $J = 7.6$  Hz, 2 H), 3.80 (s, 3 H), 3.55 (s, 3 H), 3.27 (t,  $J = 7.6$  Hz, 2 H);  $^{13}\text{C}$  NMR (150 MHz,  $\text{CDCl}_3$ ):  $\delta$  149.1, 148.4, 148.1, 135.4, 132.8, 130.5, 129.1 (2C), 126.9, 124.4, 123.1, 121.0, 120.9, 120.1, 118.1, 112.1, 111.6, 99.2, 78.1, 56.1, 55.7, 53.8, 36.8; IR (KBr, neat) 2916, 2844, 1633, 1516, 1468, 1263, 1027, 789, 748  $\text{cm}^{-1}$ ; HRMS (ESI) calcd. for  $\text{C}_{25}\text{H}_{22}\text{ClN}_2\text{O}_2$  ( $\text{M} + \text{H}$ )<sup>+</sup> 417.1364, found 417.1364.

**3-((4-Bromophenyl)ethynyl)-2-(3,4-dimethoxyphenethyl)-2H-indazole (4j):**

Pale yellow semisolid; mp 104-106  $^\circ\text{C}$ ;  $R_f$  (hexane/EtOAc 4:1) 0.53; yield 150 mg, 65%;  $^1\text{H}$  NMR (400 MHz,  $\text{CDCl}_3$ ):  $\delta$  7.76 (d,  $J = 8.8$  Hz, 1 H), 7.70 (d,  $J = 8.0$  Hz, 1 H), 7.53 (d,  $J = 8.4$  Hz, 2 H), 7.38-7.31 (m, 3 H), 7.17 (t,  $J = 7.2$  Hz, 1 H), 6.75-6.69 (m, 2 H), 6.38 (s, 1 H), 4.76 (t,  $J = 7.2$  Hz, 2 H), 3.79 (s, 3 H), 3.55 (s, 3 H), 3.27 (t,  $J = 7.6$  Hz, 2 H);  $^{13}\text{C}$  NMR (100 MHz,  $\text{CDCl}_3$ ):  $\delta$  149.1, 148.3, 148.1, 132.9, 132.0, 130.4, 126.8, 124.3, 123.6, 123.0, 121.3, 120.9,

120.0, 118.9, 118.1, 112.1, 111.6, 99.2, 78.2, 56.0, 55.7, 53.7, 36.7; IR (KBr, neat) 2932, 1624, 1515, 1463, 1263, 1139, 1010, 821, 747  $\text{cm}^{-1}$ ; HRMS (ESI) calcd. for  $\text{C}_{25}\text{H}_{22}\text{BrN}_2\text{O}_2$  (M + H)<sup>+</sup> 461.0859, found 461.0856.

**2-(3,4-Dimethoxyphenethyl)-3-((4-nitrophenyl)ethynyl)-2H-imidazole (4k):**

Yellow solid; mp 154-156 °C;  $R_f$  (hexane/EtOAc 7:3) 0.55; yield 173 mg, 81%; <sup>1</sup>H NMR (400 MHz,  $\text{CDCl}_3$ ):  $\delta$  8.25 (d,  $J = 8.4$  Hz, 2 H), 7.79 (d,  $J = 8.4$  Hz, 1 H), 7.71 (d,  $J = 8.0$  Hz, 1 H), 7.63 (d,  $J = 8.8$  Hz, 2 H), 7.37 (t,  $J = 8.0$  Hz, 1 H), 7.22 (t,  $J = 7.2$  Hz, 1 H), 6.72 (s, 2 H), 6.33 (s, 1 H), 4.79 (t,  $J = 6.8$  Hz, 2 H), 3.77 (s, 3 H), 3.53 (s, 3 H), 3.29 (t,  $J = 6.8$  Hz, 2 H); <sup>13</sup>C NMR (100 MHz,  $\text{CDCl}_3$ ):  $\delta$  149.1, 148.3, 148.2, 147.5, 133.6, 132.1, 130.3, 129.2, 127.0, 124.7, 123.9, 123.6, 120.9, 119.8, 118.3, 112.1, 111.5, 98.4, 82.2, 56.0, 55.7, 53.9, 36.7; IR (KBr, neat) 2927, 2851, 2202, 1592, 1516, 1463, 1342, 1262, 1238, 1140, 1107, 1028, 855, 748,  $\text{cm}^{-1}$ ; HRMS (ESI) calcd. for  $\text{C}_{25}\text{H}_{22}\text{N}_3\text{O}_4$  (M + H)<sup>+</sup> 428.1605, found 428.1600.

**2-Phenethyl-3-(phenylethynyl)-2H-indazole (4l):**

Red solid; mp 70-72 °C;  $R_f$  (hexane/EtOAc 4:1) 0.60; yield 126 mg, 78%; <sup>1</sup>H NMR (400 MHz,  $\text{CDCl}_3$ ):  $\delta$  7.77-7.73 (m, 2 H), 7.58-7.54 (m, 2 H), 7.43-7.40 (m, 3 H), 7.36-7.16 (m, 7 H), 4.80 (t,  $J = 8.0$  Hz, 2 H), 3.35 (t,  $J = 8.0$  Hz, 2 H); <sup>13</sup>C NMR (100 MHz,  $\text{CDCl}_3$ ):  $\delta$  148.3, 137.9, 131.7, 129.2, 129.0, 128.9, 128.8, 127.0, 126.7, 124.3, 122.9, 122.4, 120.1, 118.9, 118.1, 100.6, 77.1, 53.5, 37.2; IR (KBr, neat) 2926, 1518, 1493, 1464, 1364, 1283, 1076, 747, 689  $\text{cm}^{-1}$ ; HRMS (ESI) calcd. for  $\text{C}_{23}\text{H}_{19}\text{N}_2$  (M + H)<sup>+</sup> 323.1543, found 323.1550.

**2-Benzyl-3-(phenylethynyl)-2H-indazole (4m):**

Colorless solid; mp 78-80 °C;  $R_f$  (hexane/EtOAc 9:1) 0.62; yield 74 mg, 48%; <sup>1</sup>H NMR (400 MHz,  $\text{CDCl}_3$ ):  $\delta$  7.76 (t,  $J = 7.6$  Hz, 2 H), 7.58-7.54 (m, 2 H), 7.40-7.27 (m, 9 H), 7.19 (t,  $J = 7.6$  Hz, 1 H), 5.76 (s, 2 H); <sup>13</sup>C NMR (100 MHz,  $\text{CDCl}_3$ ):  $\delta$  148.4, 136.2, 131.7, 129.3, 129.0, 128.8, 128.7, 128.3, 128.2, 126.8, 124.7, 123.0, 122.4, 120.2, 118.3, 101.0, 77.5, 55.9; IR (KBr, neat) 2952, 2852, 1494, 1455, 1443, 1283, 1172, 1097, 748, 706, 689  $\text{cm}^{-1}$ ; HRMS (ESI) calcd. for  $\text{C}_{22}\text{H}_{17}\text{N}_2$  (M + H)<sup>+</sup> 309.1386, found 309.1396.

**2-Allyl-3-(phenylethynyl)-2H-indazole (4n):**

Pale yellow semi solid;  $R_f$  (hexane/EtOAc 9:1) 0.59; yield 76 mg, 59%;  $^1\text{H}$  NMR (400 MHz,  $\text{CDCl}_3$ ):  $\delta$  7.77 (t,  $J = 8.4$  Hz, 2 H), 7.61-7.58 (m, 2 H), 7.43-7.40 (m, 3 H), 7.35-7.31 (m, 1 H), 7.20-7.16 (m, 1 H), 6.19-6.09 (m, 1 H), 5.34-5.28 (m, 2 H), 5.21 (d,  $J = 6.0$  Hz, 2 H);  $^{13}\text{C}$  NMR (150 MHz,  $\text{CDCl}_3$ ):  $\delta$  148.4, 132.3, 131.7, 129.3, 128.8, 126.8, 124.7, 123.0, 122.5, 120.1, 119.2, 118.9, 118.3, 100.9, 77.2, 54.6; IR (KBr, neat) 2924, 2853, 1529, 1465, 1364, 1218, 1091, 927, 748,  $689\text{ cm}^{-1}$ ; HRMS (ESI) calcd. for  $\text{C}_{18}\text{H}_{15}\text{N}_2$  ( $\text{M} + \text{H}$ ) $^+$  259.1230, found 259.1236.

**2-Cyclohexyl-3-(phenylethynyl)-2H-indazole (4o):**

Pale yellow semi solid;  $R_f$  (hexane/EtOAc 9:1) 0.61; yield 99 mg, 66%;  $^1\text{H}$  NMR (400 MHz,  $\text{CDCl}_3$ ):  $\delta$  7.77 (d,  $J = 8.8$  Hz, 2 H), 7.62-7.58 (m, 2 H), 7.45-7.39 (m, 3 H), 7.31 (t,  $J = 8.0$  Hz, 1 H), 7.16 (t,  $J = 8.0$  Hz, 1 H), 4.82-4.74 (m, 1 H), 2.22-2.12 (m, 4 H), 2.32-1.95 (m, 2 H), 1.82-1.76 (m, 1 H), 1.57-1.34 (m, 3 H);  $^{13}\text{C}$  NMR (100 MHz,  $\text{CDCl}_3$ ):  $\delta$  147.9, 131.6, 129.2, 129.0, 128.8, 126.4, 124.4, 122.7, 120.0, 118.2, 117.7, 100.8, 77.5, 61.4, 33.2, 25.9, 25.5; IR (KBr, neat) 2931, 2854, 1452, 1352, 1280, 1211, 1010, 746,  $868\text{ cm}^{-1}$ ; HRMS (ESI) calcd. for  $\text{C}_{21}\text{H}_{21}\text{N}_2$  ( $\text{M} + \text{H}$ ) $^+$  301.1699, found 301.1696.

**2-Isopropyl-3-(phenylethynyl)-2H-indazole (4p):**

Pale yellow semi solid;  $R_f$  (hexane/ EtOAc 9:1) 0.62; yield 83 mg, 64%;  $^1\text{H}$  NMR (600 MHz,  $\text{CDCl}_3$ ):  $\delta$  7.80-7.77 (m, 2 H), 7.62 (t,  $J = 4.2$  Hz, 2 H), 7.44-7.39 (m, 3 H), 7.33 (t,  $J = 7.8$  Hz, 1 H), 7.18 (t,  $J = 7.8$  Hz, 1 H), 5.26-5.20 (m, 1 H), 1.71 (d,  $J = 7.2$  Hz, 6 H);  $^{13}\text{C}$  NMR (150 MHz,  $\text{CDCl}_3$ ):  $\delta$  147.9, 131.6, 129.2, 128.8, 126.4, 124.5, 122.7, 122.6, 120.0, 118.2, 117.6, 100.8, 77.3, 53.8, 22.9; IR (KBr, neat) 2923, 1641, 1459, 1347, 1276, 1235, 1082, 746,  $689\text{ cm}^{-1}$ ; HRMS (ESI) calcd. for  $\text{C}_{18}\text{H}_{17}\text{N}_2$  ( $\text{M} + \text{H}$ ) $^+$  261.1386, found 261.1389.

**2-Butyl-3-(phenylethynyl)-2H-indazole (4q):**

Pale yellow semi solid;  $R_f$  (hexane/EtOAc 9:1) 0.64; yield 96 mg, 70%;  $^1\text{H}$  NMR (400 MHz,  $\text{CDCl}_3$ ):  $\delta$  7.76 (t,  $J = 9.6$  Hz, 2 H), 7.62-7.59 (m, 2H), 7.43-7.40 (m, 3 H), 7.33 (t,  $J = 7.2$  Hz, 1H), 7.17 (t,  $J = 7.2$  Hz, 1 H), 4.60 (t,  $J = 7.6$  Hz, 2 H), 2.05 (p,  $J = 7.2$  Hz, 2 H), 1.44-1.36 (m, 2

H), 0.98 (t,  $J = 7.2$  Hz, 3 H);  $^{13}\text{C}$  NMR (100 MHz,  $\text{CDCl}_3$ ):  $\delta$  148.1, 131.6, 129.2, 128.8, 126.5, 124.4, 122.8, 122.5, 120.0, 118.8, 118.1, 100.6, 77.4, 51.8, 32.7, 20.1, 13.8; IR (KBr, neat) 2958, 2929, 2871, 2659, 2206, 2107, 1625, 1597, 1492, 1464, 1364, 1284, 1084, 746, 689  $\text{cm}^{-1}$ ; HRMS (ESI) calcd. for  $\text{C}_{19}\text{H}_{19}\text{N}_2$  ( $\text{M} + \text{H}$ ) $^+$  275.1543, found 275.1552.

**2-Butyl-3-(*p*-tolylethynyl)-6-(trifluoromethyl)-2*H*-indazole (4r):**

Pale yellow solid; mp 84-86 °C;  $R_f$  (hexane/EtOAc 9:1) 0.58; yield 107 mg, 60%;  $^1\text{H}$  NMR (600 MHz,  $\text{CDCl}_3$ ):  $\delta$  8.06 (s, 1 H), 7.86 (d,  $J = 8.4$  Hz, 1 H), 7.50 (d,  $J = 7.8$  Hz, 2 H), 7.32 (d,  $J = 9.0$  Hz, 1 H), 7.23 (d,  $J = 7.8$  Hz, 2 H), 4.62 (t,  $J = 7.2$  Hz, 2 H), 2.41 (s, 3 H), 2.05 (p,  $J = 7.2$  Hz, 2 H), 1.43-1.38 (m, 2 H), 0.98 (t,  $J = 7.2$  Hz, 3 H);  $^{13}\text{C}$  NMR (150 MHz,  $\text{CDCl}_3$ ):  $\delta$  146.6, 140.0, 131.7, 129.6, 128.7 (q,  $J = 33.0$  Hz), 125.3, 124.7 (q,  $J = 270.0$  Hz), 121.5, 119.8, 119.0, 118.4, 116.5 (q,  $J = 4.5$  Hz), 101.5, 75.9, 52.2, 32.6, 21.8, 20.0, 13.8;  $^{19}\text{F}$  NMR (376 MHz,  $\text{C}_6\text{F}_6/\text{CDCl}_3$ ):  $\delta$  99.43; IR (KBr, neat) 2926, 1653, 1455, 1337, 1252, 1164, 1123, 1084, 1045, 809  $\text{cm}^{-1}$ ; HRMS (ESI) calcd. for  $\text{C}_{21}\text{H}_{20}\text{F}_3\text{N}_2$  ( $\text{M} + \text{H}$ ) $^+$  357.1573, found 357.1572.

**2-(*tert*-Butyl)-3-(phenylethynyl)-2*H*-indazole (4s):**

Pale yellow solid; mp 92-94 °C;  $R_f$  (hexane/EtOAc 9:1) 0.70; yield 70 mg, 51%;  $^1\text{H}$  NMR (400 MHz,  $\text{CDCl}_3$ ):  $\delta$  7.77 (d,  $J = 8.4$  Hz, 2 H), 7.62-7.58 (m, 2 H), 7.44-7.39 (m, 3 H), 7.33-7.28 (m, 1 H), 7.17 (t,  $J = 7.2$  Hz, 1 H), 1.97 (s, 9 H);  $^{13}\text{C}$  NMR (100 MHz,  $\text{CDCl}_3$ ):  $\delta$  146.3, 131.3, 129.1, 128.8, 128.7, 126.8, 126.3, 123.0, 122.8, 119.8, 118.4, 101.3, 79.5, 63.1, 30.1; IR (KBr, neat) 2925, 1653, 1456, 1369, 1343, 1261, 1205, 1028, 746, 688, 668  $\text{cm}^{-1}$ ; HRMS (ESI) calcd. for  $\text{C}_{19}\text{H}_{19}\text{N}_2$  ( $\text{M} + \text{H}$ ) $^+$  275.1543, found 275.1544.

**2-Octadecyl-3-(phenylethynyl)-2*H*-indazole (4t):**

Pale yellow solid; mp 81-83 °C;  $R_f$  (hexane/EtOAc 9:1) 0.78; yield 132 mg, 56%;  $^1\text{H}$  NMR (400 MHz,  $\text{CDCl}_3$ ):  $\delta$  7.75 (t,  $J = 9.2$  Hz, 2 H), 7.63-7.58 (m, 2 H), 7.43-7.39 (m, 3 H), 7.32 (t,  $J = 8.0$  Hz, 1 H), 7.17 (t,  $J = 7.6$  Hz, 1 H), 4.59 (t,  $J = 6.8$  Hz, 2 H), 2.09-2.03 (m, 2 H), 1.37-1.21 (m, 30 H), 0.88 (t,  $J = 7.2$  Hz, 3 H);  $^{13}\text{C}$  NMR (100 MHz,  $\text{CDCl}_3$ ):  $\delta$  148.1, 131.6, 129.2, 128.8, 126.5, 124.4, 122.8, 122.6, 120.1, 118.7, 118.1, 100.6, 77.4, 52.1, 32.1, 30.7, 29.9 (4C), 29.8 (3C),



29.82, 29.8, 29.7, 29.6, 29.3, 26.8, 22.9, 14.3; IR (KBr, neat) 2920, 2852, 2213, 1641, 1465, 1368, 1279, 1025, 745, 688  $\text{cm}^{-1}$ ; HRMS (ESI) calcd. for  $\text{C}_{33}\text{H}_{47}\text{N}_2$  ( $\text{M} + \text{H}$ )<sup>+</sup> 471.3734, found 471.3721.

$^1\text{H}$  and  $^{13}\text{C}$  spectra of compound **4a**

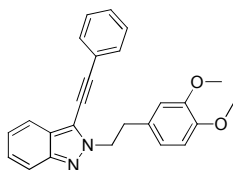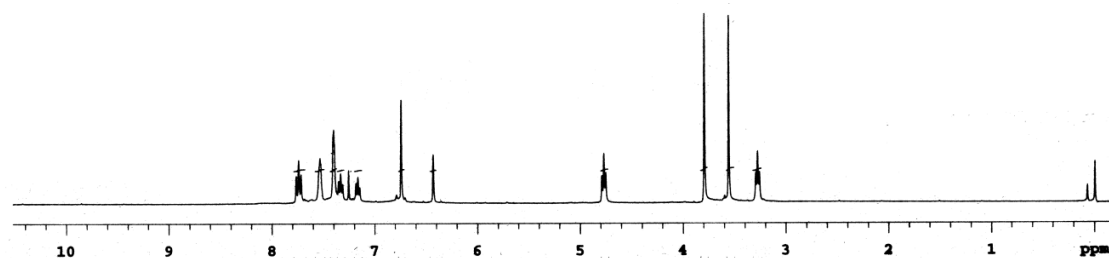

|                                                                                                                                                                                                                 |                                                                                |                                                                                                                                            |
|-----------------------------------------------------------------------------------------------------------------------------------------------------------------------------------------------------------------|--------------------------------------------------------------------------------|--------------------------------------------------------------------------------------------------------------------------------------------|
| <p>PULSE SEQUENCE: DATA PROCESSING OBSERVE H1, 399.8509634</p> <p>Relax. delay 1.000 sec</p> <p>Pulse 45.0 degrees</p> <p>Acq. time 2.561 sec</p> <p>Width 6396.0 Hz</p> <p>24 repetitions</p> <p>"ITG-NMR"</p> | <p>DATA PROCESSING AU-3112</p> <p>FT size 32768</p> <p>Total time 1 minute</p> | <p>AU-3112</p> <p>Solvent: cdcl3</p> <p>Temp: 25.0 C / 298.1 K</p> <p>Operator: chem</p> <p>File: AU-3112</p> <p>Mercury-400 "ITG-NMR"</p> |
|-----------------------------------------------------------------------------------------------------------------------------------------------------------------------------------------------------------------|--------------------------------------------------------------------------------|--------------------------------------------------------------------------------------------------------------------------------------------|

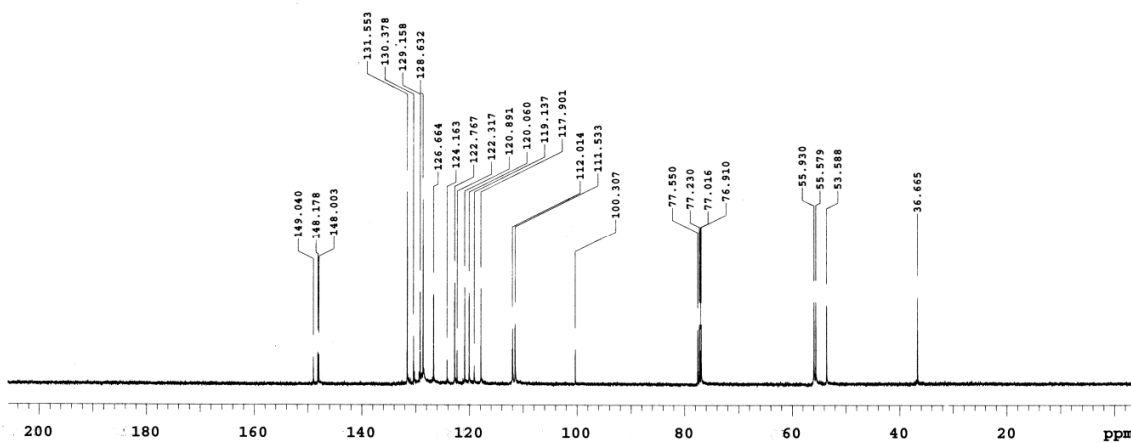

|                                                                                                                                                          |                                                                                                                                      |                                                                                                        |                                                                                                                                                             |
|----------------------------------------------------------------------------------------------------------------------------------------------------------|--------------------------------------------------------------------------------------------------------------------------------------|--------------------------------------------------------------------------------------------------------|-------------------------------------------------------------------------------------------------------------------------------------------------------------|
| <p>PULSE SEQUENCE</p> <p>Relax. delay 1.000 sec</p> <p>Pulse 45.0 degrees</p> <p>Acq. time 1.304 sec</p> <p>Width 25125.6 Hz</p> <p>1110 repetitions</p> | <p>OBSERVE C13, 100.5425947</p> <p>DECOUPLE H1, 399.8529994</p> <p>Power: 42 dB</p> <p>continuously on</p> <p>WALTZ-16 modulated</p> | <p>DATA PROCESSING</p> <p>Line broadening 0.5 Hz</p> <p>FT size 65536</p> <p>Total time 43 minutes</p> | <p>SP-562-4-f</p> <p>Solvent: cdcl3</p> <p>Temp: 25.0 C / 298.1 K</p> <p>Operator: chem</p> <p>File: AU-1Z-SPH-H1-18-c13-2</p> <p>Mercury-400 "ITG-NMR"</p> |
|----------------------------------------------------------------------------------------------------------------------------------------------------------|--------------------------------------------------------------------------------------------------------------------------------------|--------------------------------------------------------------------------------------------------------|-------------------------------------------------------------------------------------------------------------------------------------------------------------|

$^1\text{H}$  and  $^{13}\text{C}$  spectra of compound **4b**

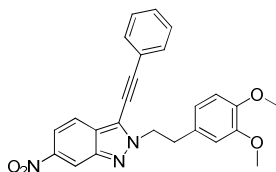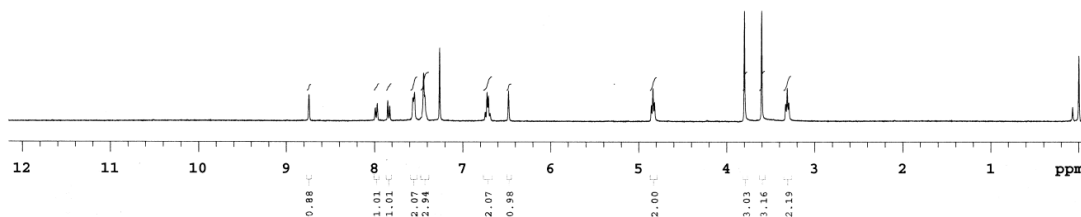

|                                                                                                                                                  |                                                                                                                              |                                                                                                                                     |                                                                                                                |
|--------------------------------------------------------------------------------------------------------------------------------------------------|------------------------------------------------------------------------------------------------------------------------------|-------------------------------------------------------------------------------------------------------------------------------------|----------------------------------------------------------------------------------------------------------------|
| <b>EXPERIMENTAL</b><br>PULSE SEQUENCE<br>Relax. delay 1.000 sec<br>Pulse 45.0 degree<br>Acq. time 2.561 sec<br>Width 6398.0 Hz<br>32 repetitions | <b>OBSERVE</b> $^1\text{H}$ 399.8509609<br>DECOUPLE H1, 399.8529994<br>Power: 42 dB<br>continuously on<br>WALTZ-16 modulated | <b>DATA PROCESSING</b><br>FT size 32768<br>Total time 1 minutes<br>Line broadening 0.5 Hz<br>FT size 65536<br>Total time 51 minutes | <b>AU-IZ-SP-NO2-H1</b><br>Solvent: cdcl3<br>Temp. 25.0 C / 298.1 K<br>Operator: chem<br>Mercury-400 *IITG-NMR* |
|--------------------------------------------------------------------------------------------------------------------------------------------------|------------------------------------------------------------------------------------------------------------------------------|-------------------------------------------------------------------------------------------------------------------------------------|----------------------------------------------------------------------------------------------------------------|

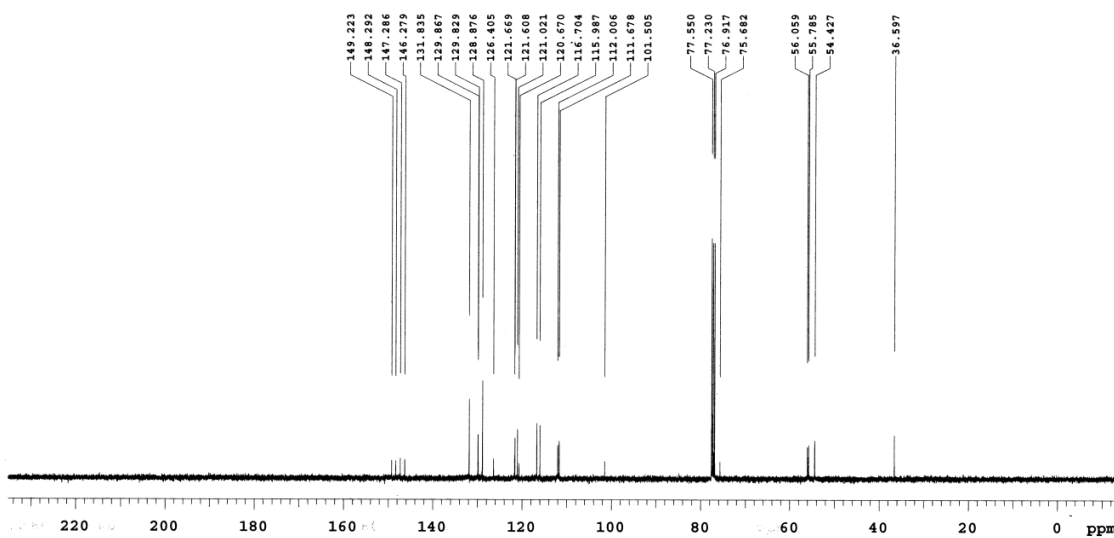

|                                                                                                                                                     |                                                                                                                                 |                                                                                            |                                                                                                                                           |
|-----------------------------------------------------------------------------------------------------------------------------------------------------|---------------------------------------------------------------------------------------------------------------------------------|--------------------------------------------------------------------------------------------|-------------------------------------------------------------------------------------------------------------------------------------------|
| <b>EXPERIMENTAL</b><br>PULSE SEQUENCE<br>Relax. delay 1.000 sec<br>Pulse 45.0 degree<br>Acq. time 1.304 sec<br>Width 25125.6 Hz<br>1340 repetitions | <b>OBSERVE</b> $^{13}\text{C}$ 100.5425824<br>DECOUPLE H1, 399.8529994<br>Power: 42 dB<br>continuously on<br>WALTZ-16 modulated | <b>DATA PROCESSING</b><br>Line broadening 0.5 Hz<br>FT size 65536<br>Total time 51 minutes | <b>AU-IZ-SP-NO2-13C</b><br>Solvent: cdcl3<br>Temp. 25.0 C / 298.1 K<br>Operator: chem<br>File: AU-IZ-SP-NO2-13C<br>Mercury-400 *IITG-NMR* |
|-----------------------------------------------------------------------------------------------------------------------------------------------------|---------------------------------------------------------------------------------------------------------------------------------|--------------------------------------------------------------------------------------------|-------------------------------------------------------------------------------------------------------------------------------------------|

# <sup>1</sup>H and <sup>13</sup>C spectra of compound 4c

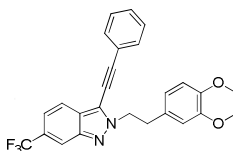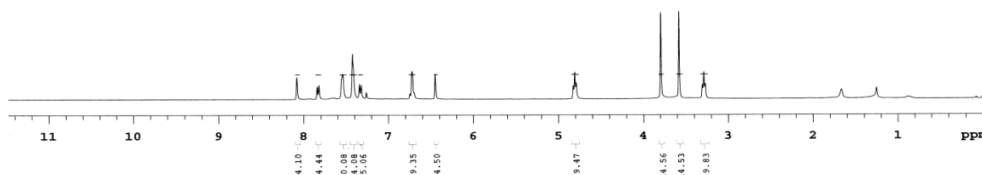

| PULSE SEQUENCE         | OBSERVE OF H1: 399.8509593 | DATA PROCESSING      | AU-IZCFPH-H1           |
|------------------------|----------------------------|----------------------|------------------------|
| Relax. delay 1.000 sec |                            | FT size 32768        |                        |
| Pulse 45.0 degrees     |                            | Total time 1 minutes |                        |
| Acq. time 2.561 sec    |                            |                      | Solvent: cdcl3         |
| Width 6398.0 Hz        |                            |                      | Temp. 25.0 C / 298.1 K |
| 32 repetitions         |                            |                      | Operator: chm          |
|                        |                            |                      | Mercury-400 *IITG-NMR* |

AU-IZCF-SP-Ph\_13C

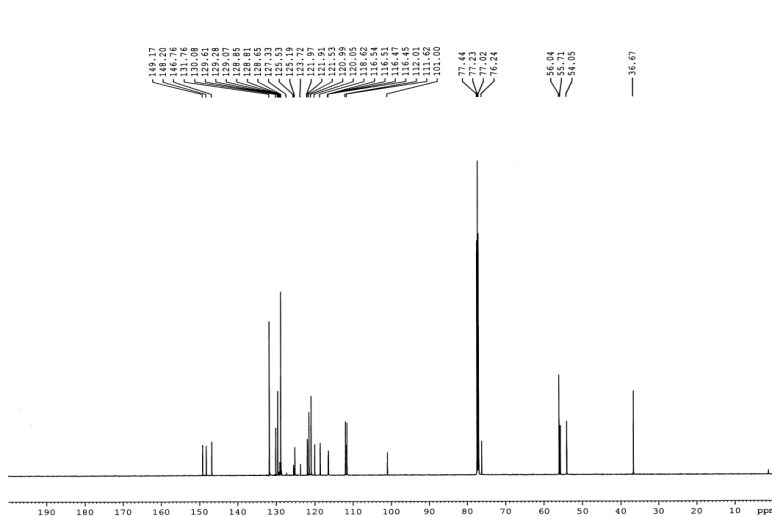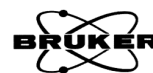

```

Current Data Parameters
NAME: AU-IZCF-SP-Ph_13C
EXPNO: 1
PROCNO: 1

F2 - Acquisition Parameters
Date_ : 20141015
Time: 10.10
INSTRUM: spect
PROBHD: 5 mm PABBO MMV
PULPROG: zgpg30
TD: 32768
SOLVENT: CDCl3
NS: 4000
DS: 2
SWH: 36057.651 Hz
FIDRES: 1.100293 Hz
AQ: 0.452325 sec
RG: 65.24
DM: 13.867 usec
DE: 6.50 usec
TE: 298.4 K
D1: 2.0000000 sec
D11: 0.0300000 sec
TDO: 1

===== CHANNEL f1 =====
SF01: 150.9279571 MHz
NUC1: 13C
P1: 10.50 usec
PLW1: 95.0000000 W

===== CHANNEL f2 =====
SF02: 600.1724007 MHz
NUC2: 1H
CPDPRG2: waltz16
P1P2: 70.00 usec
PLW2: 21.0000000 W
PLW12: 0.6174000 W
PLW13: 0.30239999 W

F2 - Processing parameters
SI: 32764
SF: 150.9128370 MHz
WSW: 2K
SBB: 0
LB: 1.00 Hz
GB: 0
PC: 1.40
    
```

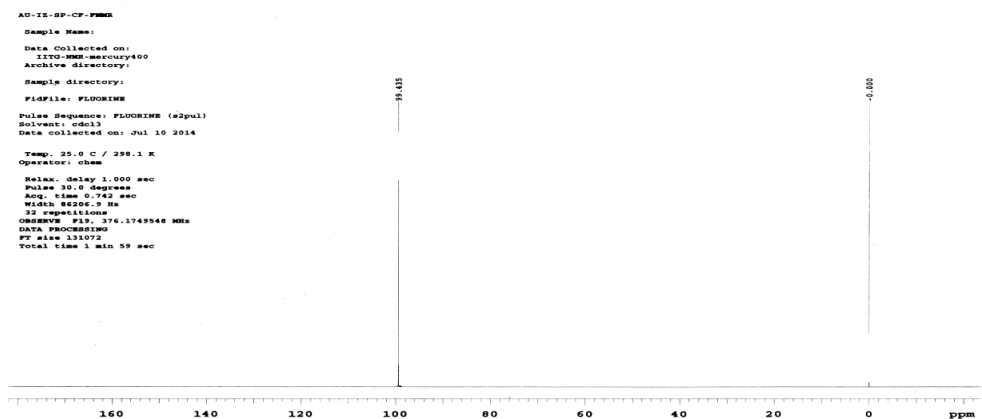

```

AU-IZ-SP-CF-PHMR
Sample Name:
Data Collected on:
IITG-NMR-mercury400
Archive directory:
Sample directory:
File: FLUORINE
Pulse Sequence: FLUORINE (zgpg1)
Solvent: cdcl3
Data collected on: Jul 10 2014
Temp. 25.0 C / 298.1 K
Operator: chm
Relax. delay 1.000 sec
Pulse 30.0 degrees
Acq. time 0.743 sec
Width 86206.9 Hz
32 repetitions
OBSERVE F19: 376.1749548 MHz
DATA PROCESSING
FT size 131072
Total time 1 min 55 sec
    
```

<sup>1</sup>H and <sup>13</sup>C spectra of compound **4d**

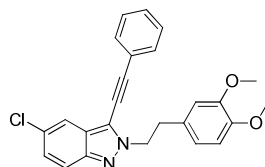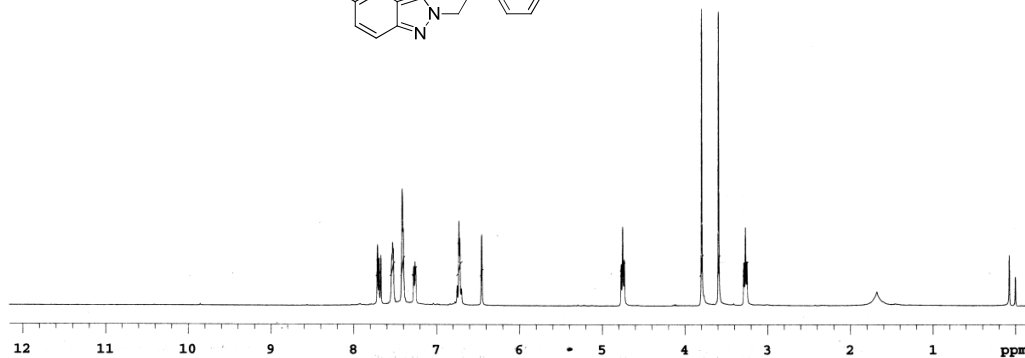

```

PULSE SEQUENCE      OBSERVE: 311: 399.8509632      DATA PROCESSING      AU-12-SCL-5-1H
Relax. delay 1.000 sec      FT size 32768
Pulse 45.0 degree      Total time: 1 minutes
Acq. time 2.561 sec
Width 6398.0 Hz
32 repetitions
Solvent: cdcl3
Temp. 25.0 C / 298.1 K
Operator: chem
File: AU-12-SCL-5-1H
Mercury-400 *1TG-NMR*
    
```

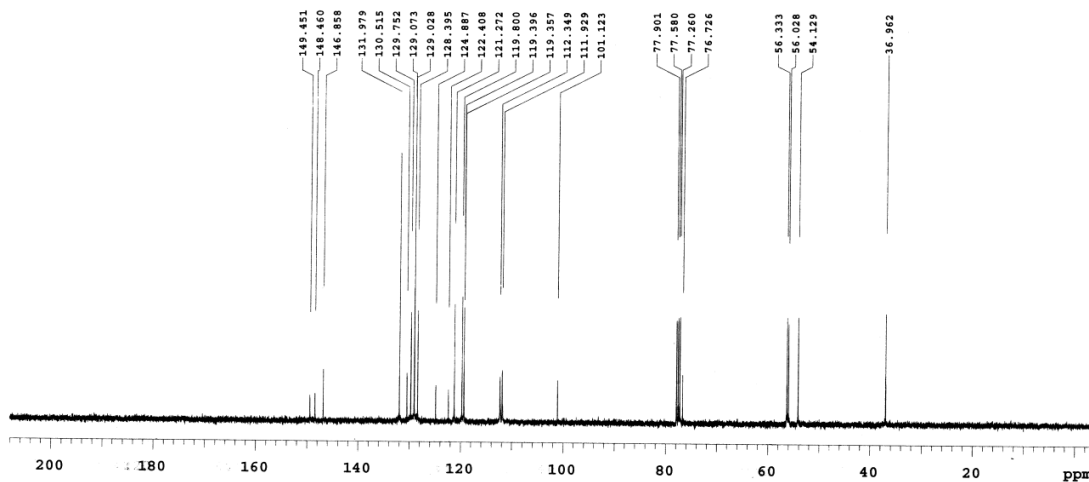

```

PULSE SEQUENCE      OBSERVE: 313: 108.5425541      DATA PROCESSING      EG-73-1H
Relax. delay 1.000 sec      DECOUPLE H1, 399.8529994      Line broadening 0.5 Hz
Pulse 45.0 degree      Power: 42.0 dB      FT size 65536
Acq. time 1.304 sec      continuously on      Total time 18 minutes
Width 25125.6 Hz      WALTZ-16 modulated
470 repetitions
Solvent: cdcl3
Temp. 25.0 C / 298.1 K
Operator: chem
Mercury-400 *1TG-NMR*
    
```

# $^1\text{H}$ and $^{13}\text{C}$ spectra of compound **4e**

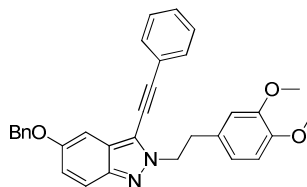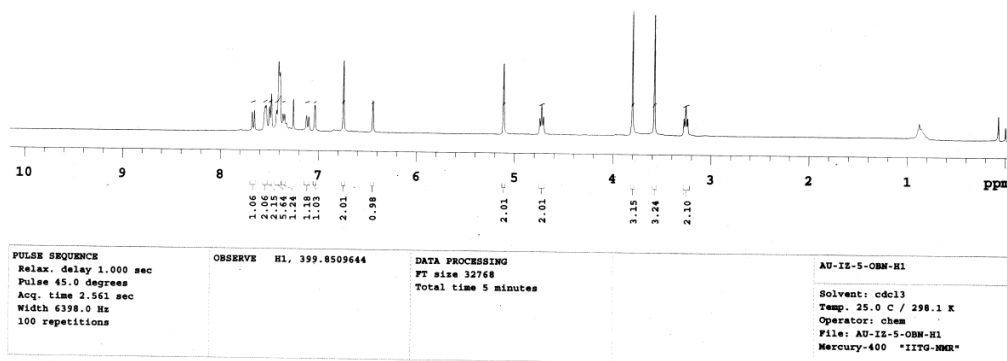

AU-IZ-5-OBN-13C

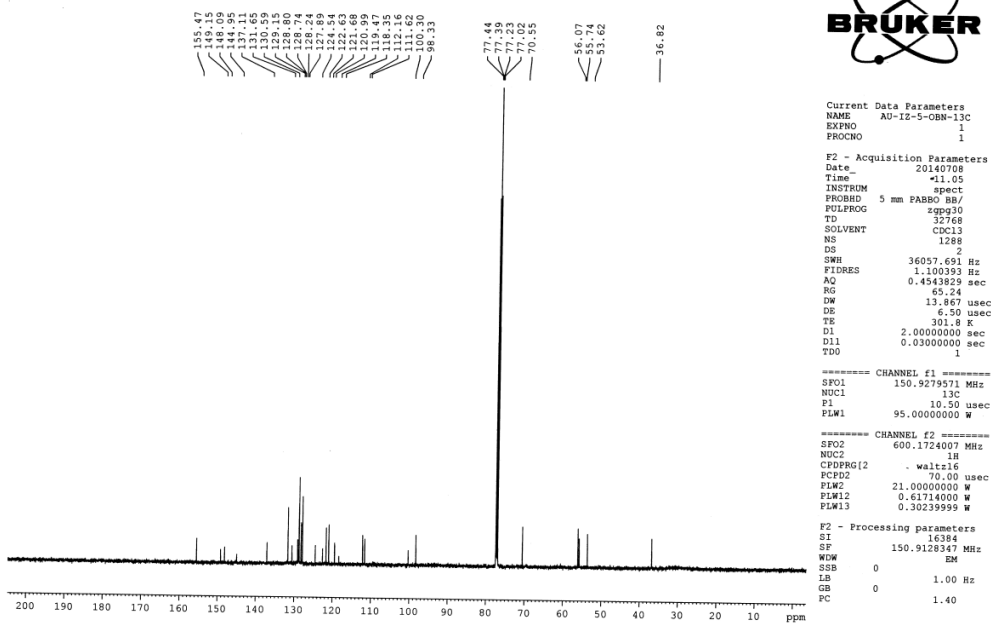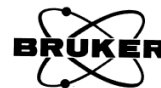

```

Current Data Parameters
NAME      AU-IZ-5-OBN-13C
EXPNO    1
PROCNO   1

F2 - Acquisition Parameters
Date_    20140708
Time     11:05
INSTRUM  spect
PROBHD   5 mm PABBO BB/
PULPROG  zgpg30
TD        32768
SOLVENT  CDCl3
NS        1288
DS        2
SWH       36057.691 Hz
FIDRES    1.100393 Hz
AQ         0.4543829 sec
RG         65.24
DW         13.867 usec
DE         6.50 usec
TE         301.8 K
D1         2.0000000 sec
D11        0.0300000 sec
TDD        1

===== CHANNEL f1 =====
SF01      150.9279571 MHz
NUC1       13C
P1         10.50 usec
PLW1       95.0000000 W

===== CHANNEL f2 =====
SF02      600.1724007 MHz
NUC2       1H
CPDPRG2   . waltz16
PCPD2     70.00 usec
PLW2      21.0000000 W
PLW12     0.61714000 W
PLW13     0.30239999 W

F2 - Processing parameters
SI         16384
SF         150.9128347 MHz
WDW        EM
SSB        0
LB         1.00 Hz
GB         0
PC         1.40
    
```

<sup>1</sup>H and <sup>13</sup>C spectra of compound **4f**

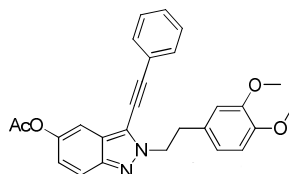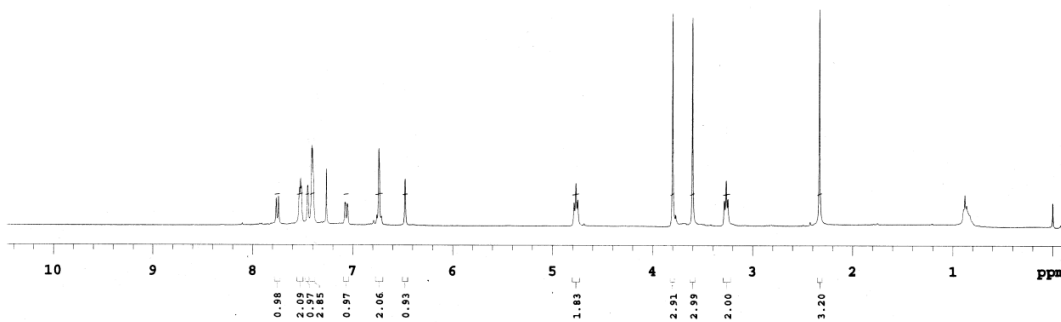

|                                                                                                                                   |                                |                                                                 |                                                                                                                                      |
|-----------------------------------------------------------------------------------------------------------------------------------|--------------------------------|-----------------------------------------------------------------|--------------------------------------------------------------------------------------------------------------------------------------|
| <b>PULSE SEQUENCE</b><br>Relax. delay 1.000 sec<br>Pulse 45.0 degrees<br>Acq. time 2.561 sec<br>Width 6398.0 Hz<br>32 repetitions | <b>OBSERVE H1, 399.8509625</b> | <b>DATA PROCESSING</b><br>FT size 32768<br>Total time 1 minutes | <b>AU-IZ-OAc-5-1H</b><br>Solvent: cdc13<br>Temp: 25.0 C / 298.1 K<br>Operator: chem<br>File: AU-IZ-OAc-5-1H<br>Mercury-400 *17G-MMR* |
|-----------------------------------------------------------------------------------------------------------------------------------|--------------------------------|-----------------------------------------------------------------|--------------------------------------------------------------------------------------------------------------------------------------|

AU-IZ-5OAc\_13C

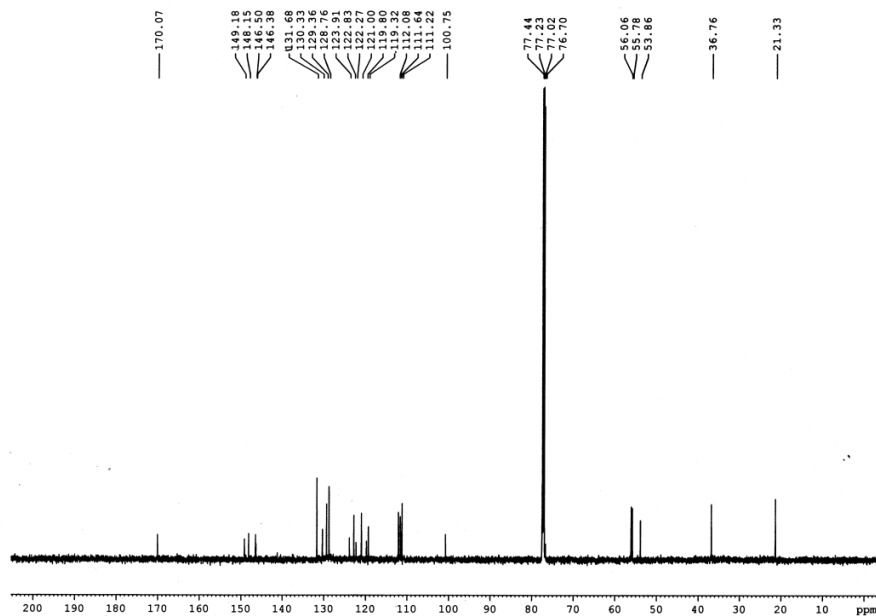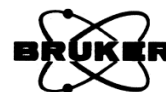

```

Current Data Parameters
NAME      AU-IZ-5OAc_13C
EXPNO    1
PROCNO   1

F2 - Acquisition Parameters
Date_    20140708
Time     19.47
INSTRUM spect
PROBHD   5 mm PABBO BB/
PULPROG zgpg30
TD       32768
SOLVENT  CDCl3
NS       417
DS       2
SWH      36057.691 Hz
FIDRES   1.100393 Hz
AQ       0.4543829 sec
RG       65.24
DM       13.867 usec
DE       6.50 usec
TE       301.3 K
D1       2.00000000 sec
D11      0.03000000 sec
TD0      1

===== CHANNEL f1 =====
SFO1     150.9279571 MHz
NUC1     13C
P1       10.50 usec
PLW1     95.00000000 W

===== CHANNEL f2 =====
SFO2     600.1724007 MHz
NUC2     1H
CPDPRG2  waltz16
PCPD2    70.00 usec
PLW2     21.00000000 W
PLW12    0.61714000 W
PLW13    0.30239999 W

F2 - Processing parameters
SI       16384
SF       150.9128347 MHz
WDW      EM
SSB      0
LB       1.00 Hz
GB       0
PC       1.40
    
```

<sup>1</sup>H and <sup>13</sup>C spectra of compound **4g**

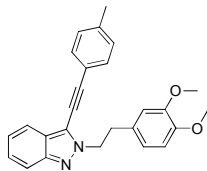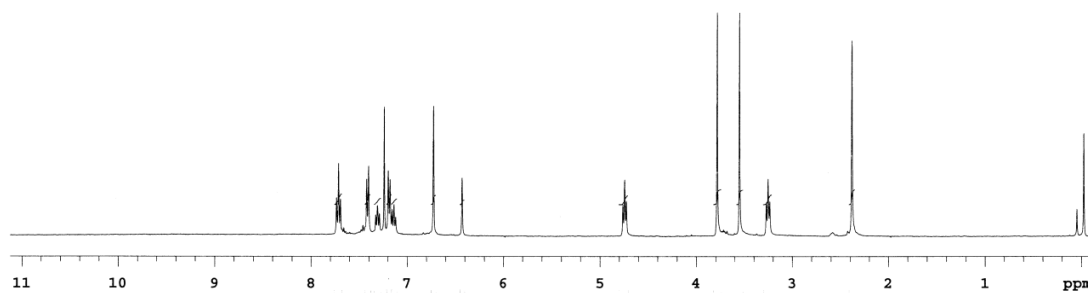

|                                                                                                                                   |                                |                                                                                           |                                                                                                                |
|-----------------------------------------------------------------------------------------------------------------------------------|--------------------------------|-------------------------------------------------------------------------------------------|----------------------------------------------------------------------------------------------------------------|
| <b>PULSE SEQUENCE</b><br>Relax. delay 1.000 sec<br>Pulse 45.0 degrees<br>Acq. time 2.561 sec<br>Width 6398.0 Hz<br>32 repetitions | <b>OBSERVE</b> H1, 399.8509695 | <b>DATA PROCESSING</b><br>Line broadening 1.0 Hz<br>FT size 32768<br>Total time 1 minutes | aks-aa<br>Solvent: cdcl3<br>Temp. 25.0 C / 298.1 K<br>Operator: chem<br>File: aks-aa<br>Mercury-400 *IITG-NMR* |
|-----------------------------------------------------------------------------------------------------------------------------------|--------------------------------|-------------------------------------------------------------------------------------------|----------------------------------------------------------------------------------------------------------------|

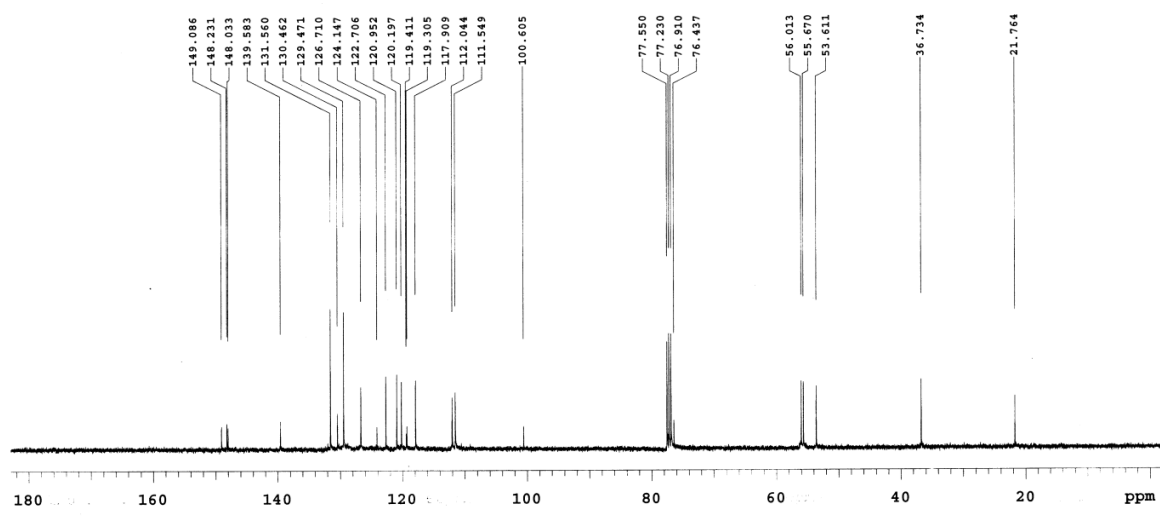

|                                                                                                                                      |                                                                                                                             |                                                                                            |                                                                                                                                |
|--------------------------------------------------------------------------------------------------------------------------------------|-----------------------------------------------------------------------------------------------------------------------------|--------------------------------------------------------------------------------------------|--------------------------------------------------------------------------------------------------------------------------------|
| <b>PULSE SEQUENCE</b><br>Relax. delay 1.000 sec<br>Pulse 45.0 degrees<br>Acq. time 1.304 sec<br>Width 25125.6 Hz<br>1650 repetitions | <b>OBSERVE</b> CDCl3, 100.625855<br><b>DECOUPLE</b> H1, 399.8529994<br>Power 42 dB<br>continuously on<br>WALTZ-16 modulated | <b>DATA PROCESSING</b><br>Line broadening 0.5 Hz<br>FT size 65536<br>Total time 63 minutes | AU-IQPHMe2-C13<br>Solvent: cdcl3<br>Temp. 25.0 C / 298.1 K<br>Operator: chem<br>File: AU-IQPHMe2-C13<br>Mercury-400 *IITG-NMR* |
|--------------------------------------------------------------------------------------------------------------------------------------|-----------------------------------------------------------------------------------------------------------------------------|--------------------------------------------------------------------------------------------|--------------------------------------------------------------------------------------------------------------------------------|



# <sup>1</sup>H and <sup>13</sup>C spectra of compound 4h

AU-IZ-SP-PTB\_1H

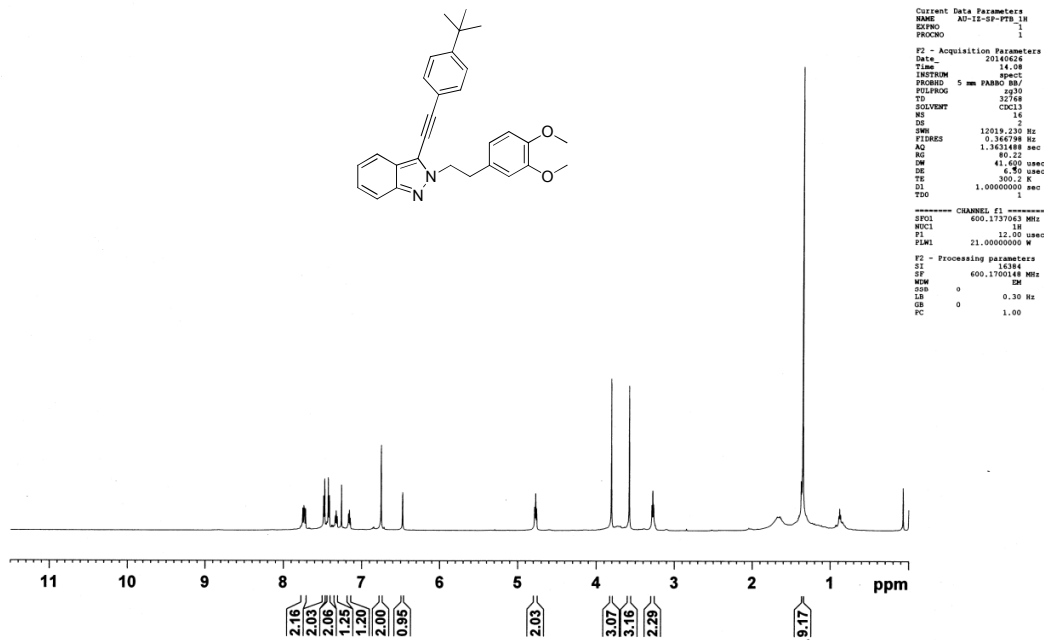

```

Current Data Parameters
NAME AU-IZ-SP-PTB_1H
EXPNO 1
PROCNO 1

F2 - Acquisition Parameters
Date_ 20140626
Time 14.08
INSTRUM spect
PROBHD 5 mm PABBO BBO
PULPROG zg30
TD 32768
SOLVENT CDCl3
NS 14
DS 2
SWH 12019.210 Hz
FIDRES 0.362798 Hz
AQ 1.3431488 sec
RG 80.22
MW 41.600 usec
DE 6.50 usec
TE 300.2 K
D1 1.00000000 sec
TDO 1

----- CHANNEL f1 -----
SFO1 600.137063 MHz
NUC1 1H
P1 12.00 usec
PL1 21.00000000 W

F2 - Processing parameters
SI 16384
SF 600.137063 MHz
WDW EM
SSB 0
LB 0.30 Hz
GB 0
PC 1.00
    
```

AU-IZ-SP-PTB\_13C

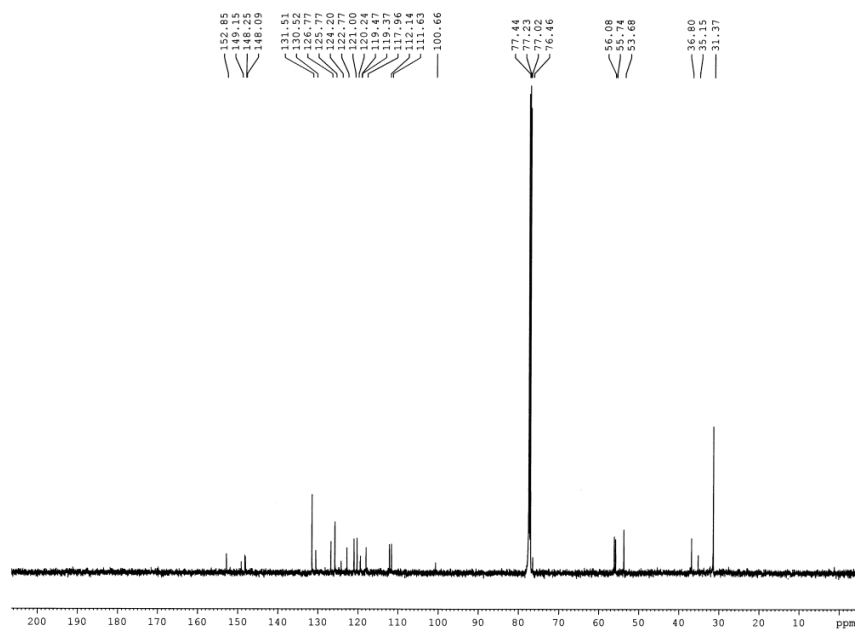

```

Current Data Parameters
NAME AU-IZ-SP-PTB_13C
EXPNO 1
PROCNO 1

F2 - Acquisition Parameters
Date_ 20140626
Time 14.19
INSTRUM spect
PROBHD 5 mm PABBO BBO
PULPROG zgpg30
TD 65536
SOLVENT CDCl3
NS 562
DS 2
SWH 36057.691 Hz
FIDRES 1.100593 Hz
AQ 0.4543829 sec
RG 65.24
MW 13.867 usec
DE 6.50 usec
TE 300.2 K
D1 2.00000000 sec
d11 0.03000000 sec
TDO 1

----- CHANNEL f1 -----
SFO1 150.927871 MHz
NUC1 13C
P1 10.50 usec
PL1 95.00000000 W

----- CHANNEL f2 -----
SFO2 600.1724007 MHz
NUC2 1H
CPDPRG2 waltz16
PCPD2 70.00 usec
PLM2 21.00000000 W
PLM12 0.61714000 W
PLM13 0.30239999 W

F2 - Processing parameters
SI 16384
SF 150.918341 MHz
WDW EM
SSB 0
LB 1.00 Hz
GB 0
PC 1.40
    
```



$^1\text{H}$  and  $^{13}\text{C}$  spectra of compound **4j**

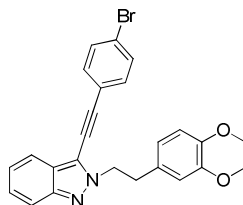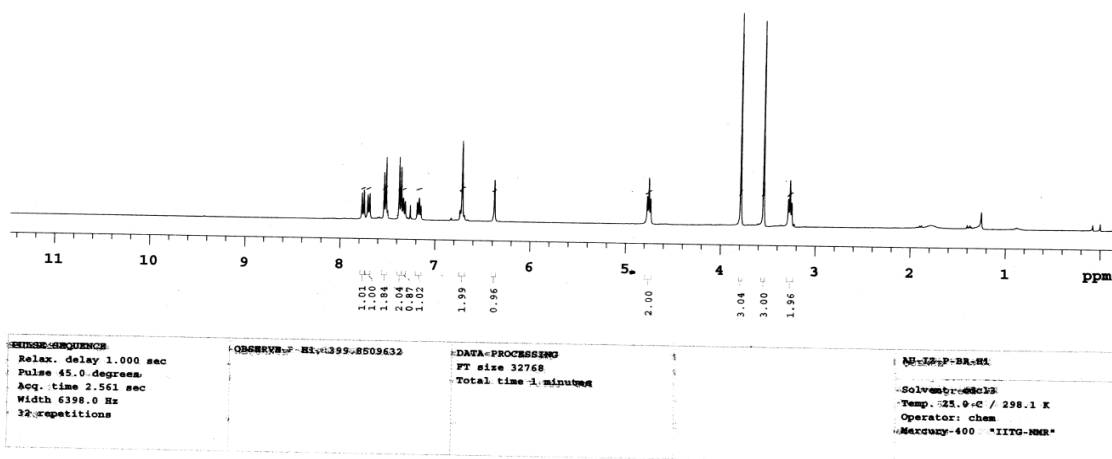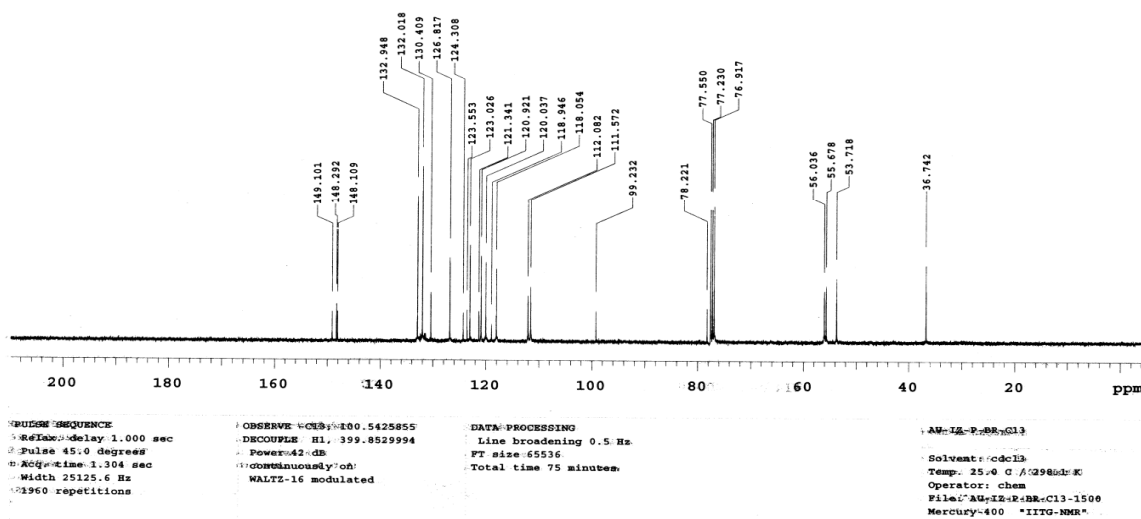

<sup>1</sup>H and <sup>13</sup>C spectra of compound 4k

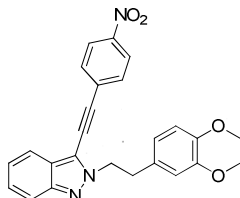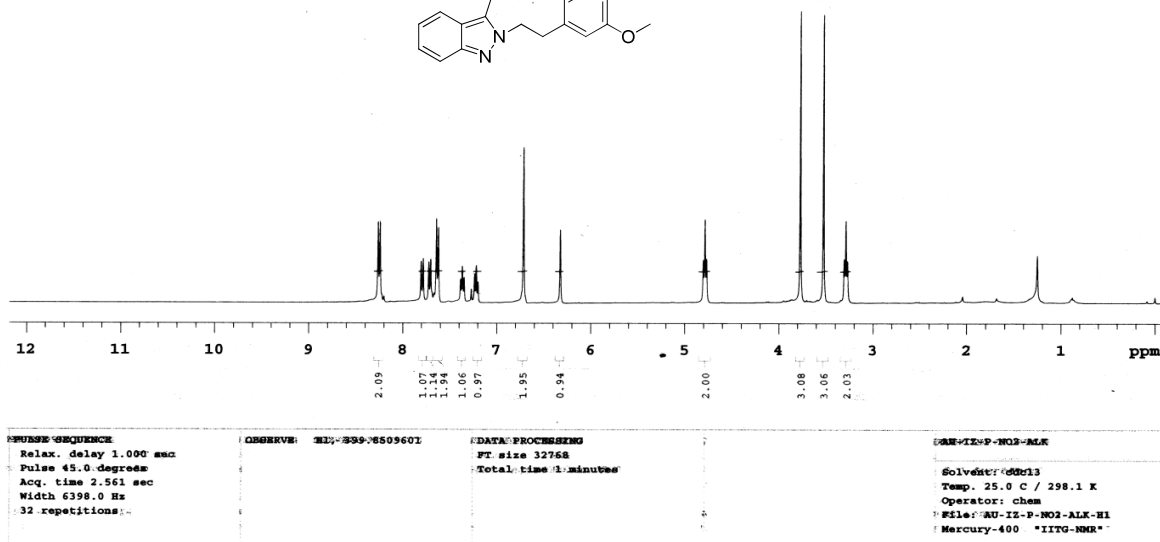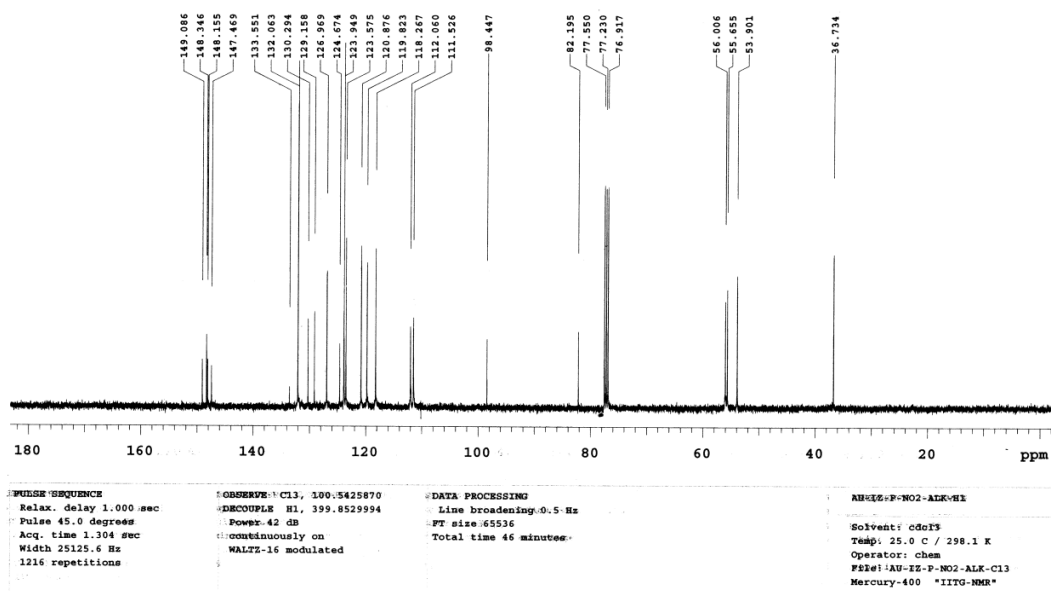

$^1\text{H}$  and  $^{13}\text{C}$  spectra of compound **4I**

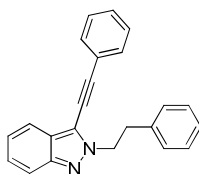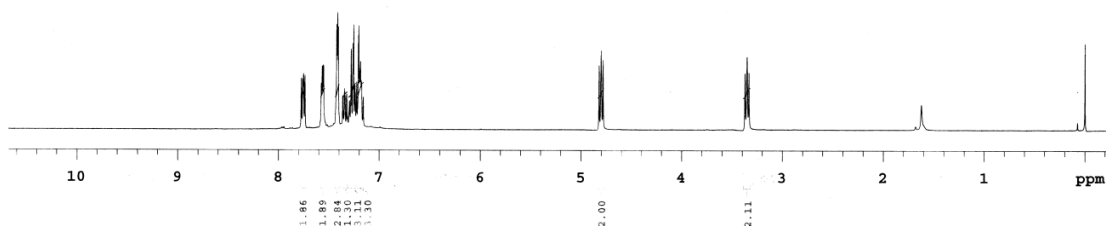

|                        |                                |                        |                        |
|------------------------|--------------------------------|------------------------|------------------------|
| <b>PULSE SEQUENCE</b>  | <b>OBSERVE</b> H1, 399.8509632 | <b>DATA PROCESSING</b> | <b>NAME</b> si1p1h1    |
| Relax. delay 1.000 sec |                                | FT size 32768          | Solvent: cdcl3         |
| Pulse 45.0 degree      |                                | Total time 1 minutes   | Temp. 25.0 C / 298.1 K |
| Acq. time 2.561 sec    |                                |                        | Operator: chem         |
| Width 6398.0 Hz        |                                |                        | File: au1si1p1h1       |
| 32 repetitions         |                                |                        | Mercury-400 *IITG-NMR* |

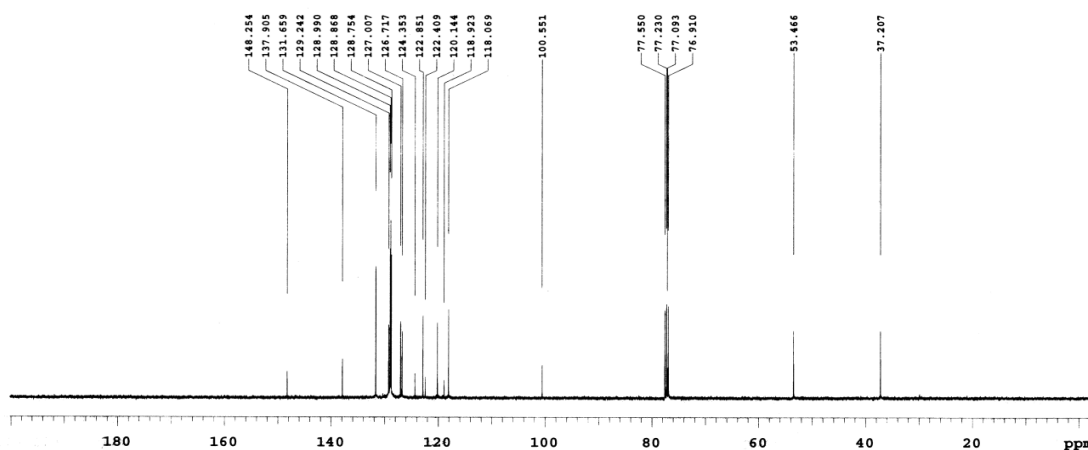

|                        |                                 |                        |                           |
|------------------------|---------------------------------|------------------------|---------------------------|
| <b>PULSE SEQUENCE</b>  | <b>OBSERVE</b> C13, 100.9425870 | <b>DATA PROCESSING</b> | <b>NAME</b> SI1p1h1_13C-1 |
| Relax. delay 1.000 sec | <b>DECOUPLE</b> H1, 399.8529994 | Line broadening 0.5 Hz | Solvent: cdcl3            |
| Pulse 45.0 degree      | Power 42 dB                     | FT size 65536          | Temp. 25.0 C / 298.1 K    |
| Acq. time 1.204 sec    | continuously on                 | Total time 31 minutes  | Operator: chem            |
| Width 25125.6 Hz       | WALTZ-16 modulated              |                        | File: au-SI1p1h1-13C-1    |
| 820 repetitions        |                                 |                        | Mercury-400 *IITG-NMR*    |

<sup>1</sup>H and <sup>13</sup>C spectra of compound 4m

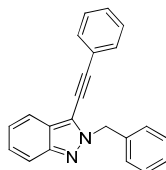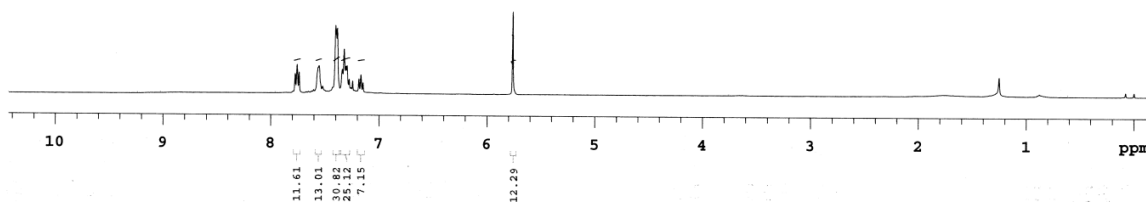

|                                                                                                                                   |                                |                                                                 |                                                                                                              |
|-----------------------------------------------------------------------------------------------------------------------------------|--------------------------------|-----------------------------------------------------------------|--------------------------------------------------------------------------------------------------------------|
| <b>PULSE SEQUENCE</b><br>Relax. delay 1.000 sec<br>Pulse 45.0 degrees<br>Acq. time 2.561 sec<br>Width 6398.0 Hz<br>32 repetitions | <b>OBSERVE</b> H1, 399.8509675 | <b>DATA PROCESSING</b><br>FT size 32768<br>Total time 1 minutes | <b>AU-IZ2BNPH-H1</b><br>Solvent: cdcl3<br>Temp. 25.0 C / 298.1 K<br>Operator: chem<br>Mercury-400 "IITG-NMR" |
|-----------------------------------------------------------------------------------------------------------------------------------|--------------------------------|-----------------------------------------------------------------|--------------------------------------------------------------------------------------------------------------|

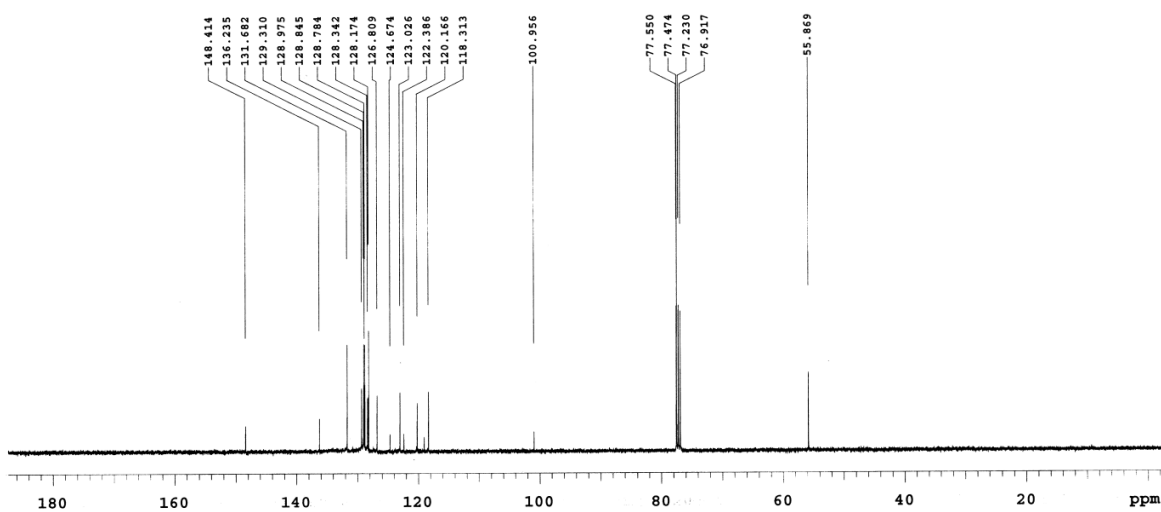

|                                                                                                                                      |                                                                                                                            |                                                                                            |                                                                                                                                       |
|--------------------------------------------------------------------------------------------------------------------------------------|----------------------------------------------------------------------------------------------------------------------------|--------------------------------------------------------------------------------------------|---------------------------------------------------------------------------------------------------------------------------------------|
| <b>PULSE SEQUENCE</b><br>Relax. delay 1.000 sec<br>Pulse 45.0 degrees<br>Acq. time 1.304 sec<br>Width 25125.6 Hz<br>1130 repetitions | <b>OBSERVE</b> C13, 100.5425840<br><b>DECOUPLE</b> H1, 399.8529994<br>Power 42 dB<br>continuously on<br>WALTZ-16 modulated | <b>DATA PROCESSING</b><br>Line broadening 0.5 Hz<br>FT size 65536<br>Total time 43 minutes | <b>AU-IZ-s-bn-c13</b><br>Solvent: Cdc13<br>Temp. 25.0 C / 298.1 K<br>Operator: chem<br>File: AU-IZ-s-bn-c13<br>Mercury-400 "IITG-NMR" |
|--------------------------------------------------------------------------------------------------------------------------------------|----------------------------------------------------------------------------------------------------------------------------|--------------------------------------------------------------------------------------------|---------------------------------------------------------------------------------------------------------------------------------------|

# $^1\text{H}$ and $^{13}\text{C}$ spectra of compound **4n**

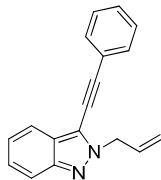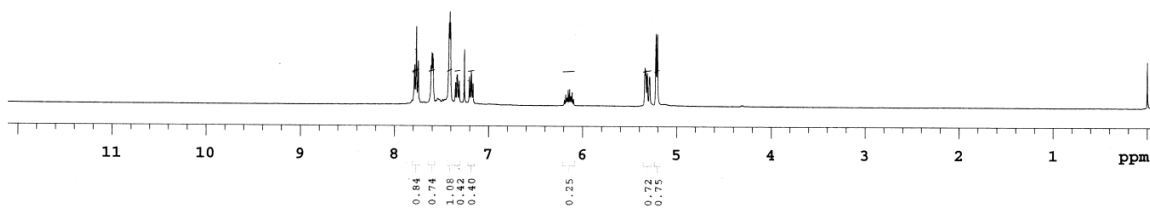

|                                                                                                                                   |                                           |                                                                 |                                                                                                                            |
|-----------------------------------------------------------------------------------------------------------------------------------|-------------------------------------------|-----------------------------------------------------------------|----------------------------------------------------------------------------------------------------------------------------|
| <b>PULSE SEQUENCE</b><br>Relax. delay 1.000 sec<br>Pulse 45.0 degrees<br>Acq. time 2.561 sec<br>Width 6398.0 Hz<br>32 repetitions | <b>OBSERVE</b> $^1\text{H}$ , 399.8509636 | <b>DATA PROCESSING</b><br>FT size 32768<br>Total time 1 minutes | <b>AU-IZ-AL'</b><br>Solvent: cdcl3<br>Temp. 25.0 C / 298.1 K<br>Operator: chem<br>File: AU-IZ-AL<br>Mercury-400 *IITG-NMR* |
|-----------------------------------------------------------------------------------------------------------------------------------|-------------------------------------------|-----------------------------------------------------------------|----------------------------------------------------------------------------------------------------------------------------|

IZ-AL\_13C

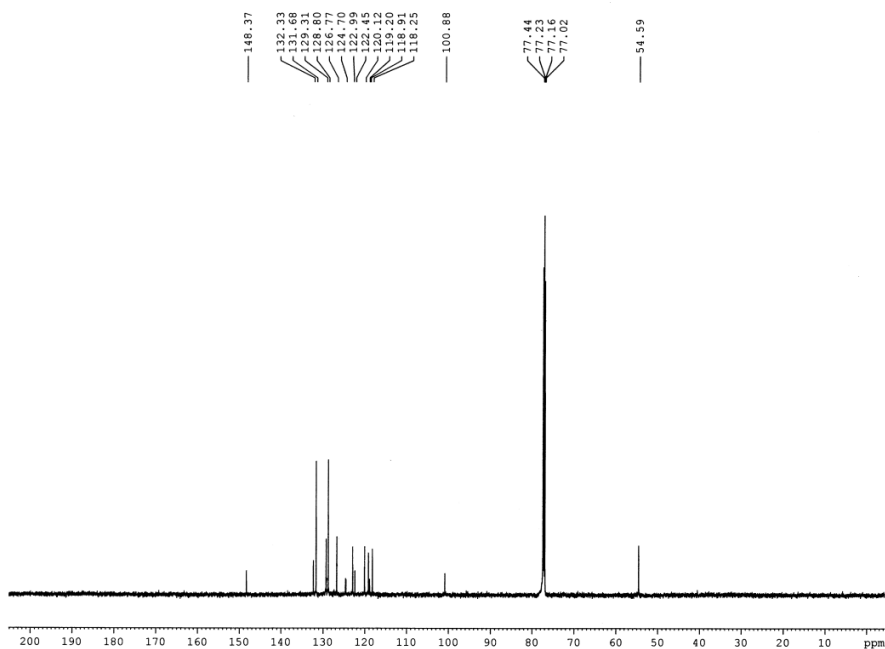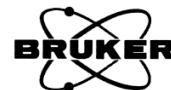

```

Current Data Parameters
NAME      AU-IZ-AL_13C
EXPNO    1
PROCNO   1

F2 - Acquisition Parameters
Date_    20140401
Time     16.00
INSTRUM spect
PROBHD   5 mm PABBO BB/
PULPROG zgpg30
TD       32768
SOLVENT  CDCl3
NS       716
DS       2
SWH      36057.691 Hz
FIDRES   1.100393 Hz
AQ       0.4543829 sec
RG       65.24
DW       13.867 usec
DE       6.50 usec
TE       298.2 K
D1       2.0000000 sec
D11      0.03000000 sec
TDO      1

----- CHANNEL f1 -----
SFO1    150.9279571 MHz
NUC1     13C
P1       10.50 usec
PLW1     95.0000000 W

----- CHANNEL f2 -----
SFO2    600.1724007 MHz
NUC2     1H
CPDPRG2 waltz16
PCPD2   70.00 usec
PLW2    21.0000000 W
PLW12   0.61714000 W
PLW13   0.302299999 W

F2 - Processing parameters
SI       16384
SF       150.9128348 MHz
WDW      EM
SSB      0
LB       1.00 Hz
GB       0
PC       1.40
    
```

<sup>1</sup>H and <sup>13</sup>C spectra of compound **4o**

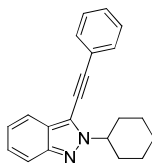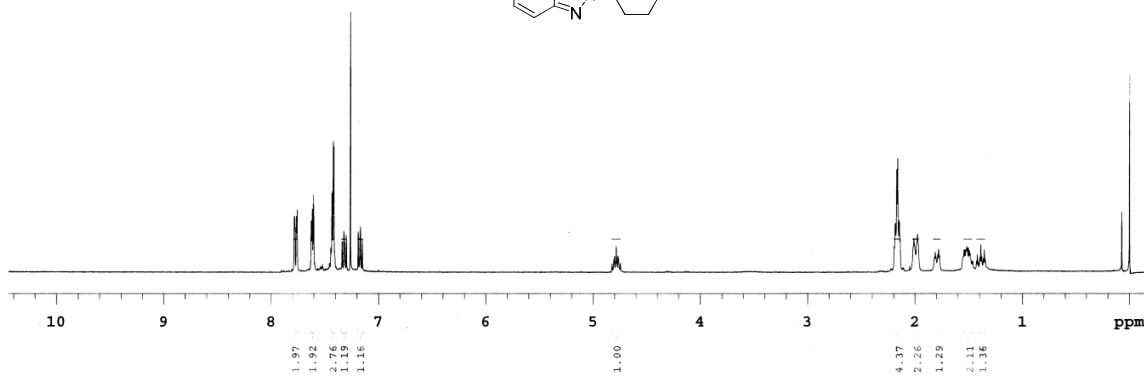

|                                                                                                                                   |                                |                                                                 |                                                                                                                                  |
|-----------------------------------------------------------------------------------------------------------------------------------|--------------------------------|-----------------------------------------------------------------|----------------------------------------------------------------------------------------------------------------------------------|
| <b>PULSE SEQUENCE</b><br>Relax. delay 1.000 sec<br>Pulse 45.0 degrees<br>Acq. time 2.561 sec<br>Width 6398.0 Hz<br>32 repetitions | <b>OBSERVE</b> H1, 399.8509609 | <b>DATA PROCESSING</b><br>FT size 32768<br>Total time 1 minutes | <b>AU-IZCY-HENCE</b><br>Solvent: cdcl3<br>Temp. 25.0 C / 298.1 K<br>Operator: chem<br>File: AU-IZCY-H1<br>Mercury-400 *IITG-NMR* |
|-----------------------------------------------------------------------------------------------------------------------------------|--------------------------------|-----------------------------------------------------------------|----------------------------------------------------------------------------------------------------------------------------------|

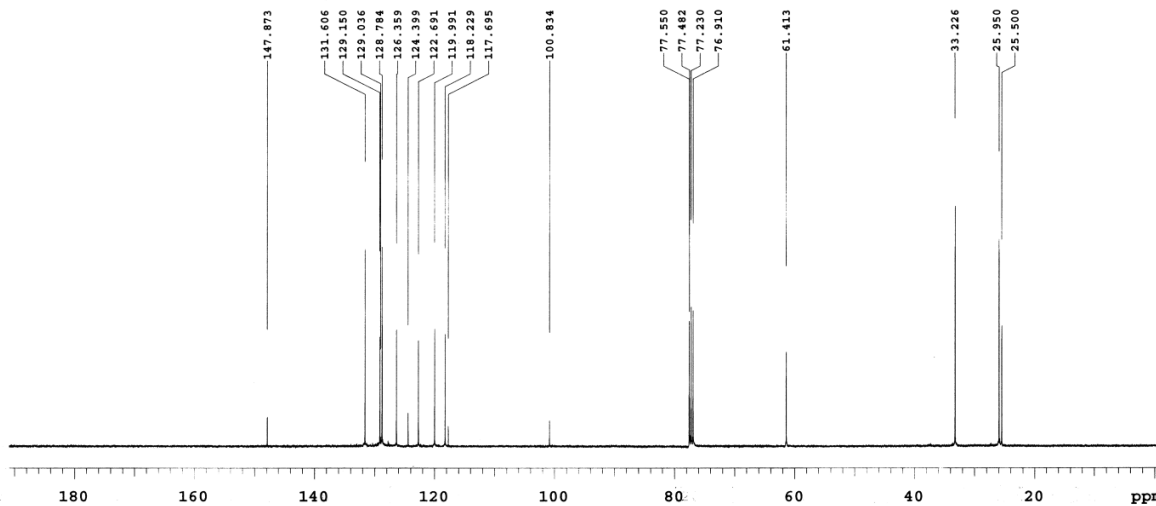

|                                                                                                                                      |                                                                                                                            |                                                                                           |                                                                                                                                      |
|--------------------------------------------------------------------------------------------------------------------------------------|----------------------------------------------------------------------------------------------------------------------------|-------------------------------------------------------------------------------------------|--------------------------------------------------------------------------------------------------------------------------------------|
| <b>PULSE SEQUENCE</b><br>Relax. delay 1.000 sec<br>Pulse 45.0 degrees<br>Acq. time 1.304 sec<br>Width 25125.6 Hz<br>5960 repetitions | <b>OBSERVE</b> C13, 100.5425840<br><b>DECOUPLE</b> H1, 399.8529994<br>Power 42 dB<br>continuously on<br>WALTZ-16 modulated | <b>DATA PROCESSING</b><br>Line broadening 0.5 Hz<br>FT size 65536<br>Total time 3.8 hours | <b>AU-IZ-CYPH-13C</b><br>Solvent: cdcl3<br>Temp. 25.0 C / 298.1 K<br>Operator: chem<br>File: AU-IZcypH-13C<br>Mercury-400 *IITG-NMR* |
|--------------------------------------------------------------------------------------------------------------------------------------|----------------------------------------------------------------------------------------------------------------------------|-------------------------------------------------------------------------------------------|--------------------------------------------------------------------------------------------------------------------------------------|



# $^1\text{H}$ and $^{13}\text{C}$ spectra of compound **4p**

AU-IZ-ISP-1H

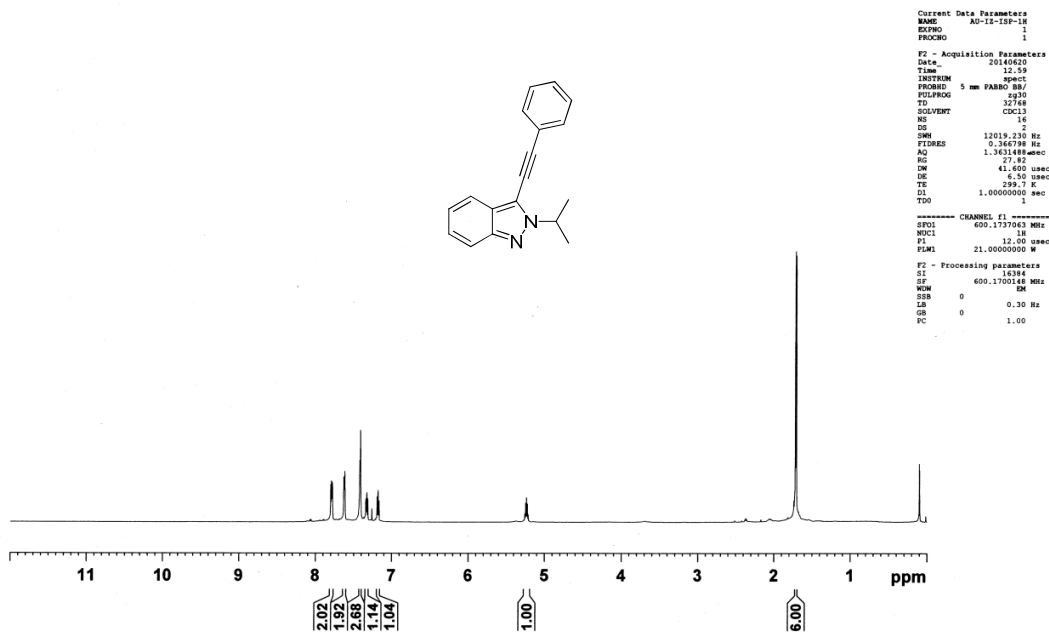

```
Current Data Parameters
NAME      AU-IZ-ISP-1H
EXPNO     1
PROCNO    1

F2 - Acquisition Parameters
Date_     20140620
Time      12.59
INSTRUM   spect
PROBHD    5 mm PABBO BB/
PULPROG   zgpg30
TD         32768
SOLVENT   CDCl3
NS         16
DS         2
SWH        12019.230 Hz
FIDRES     0.366798 Hz
AQ         1.3631489 sec
RG         27.82
DE         41.600 usec
TE         299.7 K
D1         1.00000000 sec
TD0        1

----- CHANNEL f1 -----
SFO1      600.1737943 MHz
NUC1       1H
P1         12.00 usec
PLM1      21.00000000 W

F2 - Processing parameters
SI         16384
SF         600.1700148 MHz
WDW        EM
SSB        0
LB         0.30 Hz
GB         0
PC         1.00
```

AU-IZ-ISP-13C

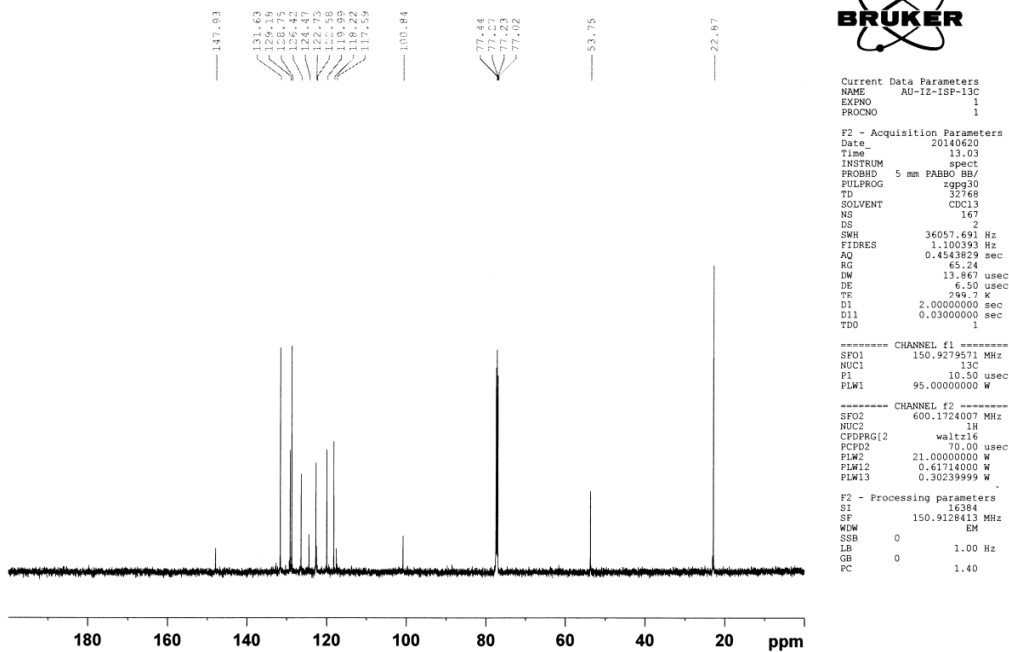

<sup>1</sup>H and <sup>13</sup>C spectra of compound 4q

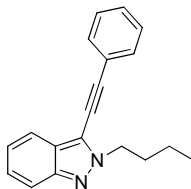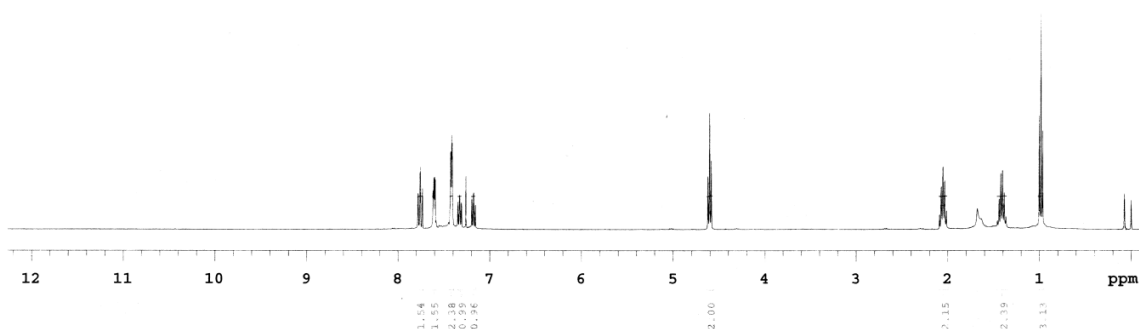

|                        |                                |                        |                        |
|------------------------|--------------------------------|------------------------|------------------------|
| <b>PULSE SEQUENCE</b>  | <b>OBSERVE</b> H1, 399.8509613 | <b>DATA PROCESSING</b> | <b>SU-2FU</b>          |
| Relax. delay 1.000 sec |                                | FT size 16384          | Solvent: cdc13         |
| Pulse 45.0 degrees     |                                | Total time 1 minute    | Temp. 25.0 C / 298.1 K |
| Acq. time 0.640 sec    |                                |                        | Operator: chem         |
| Width 10000.0 Hz       |                                |                        | Mercury-400 "IITG-NMR" |
| 32 repetitions         |                                |                        |                        |

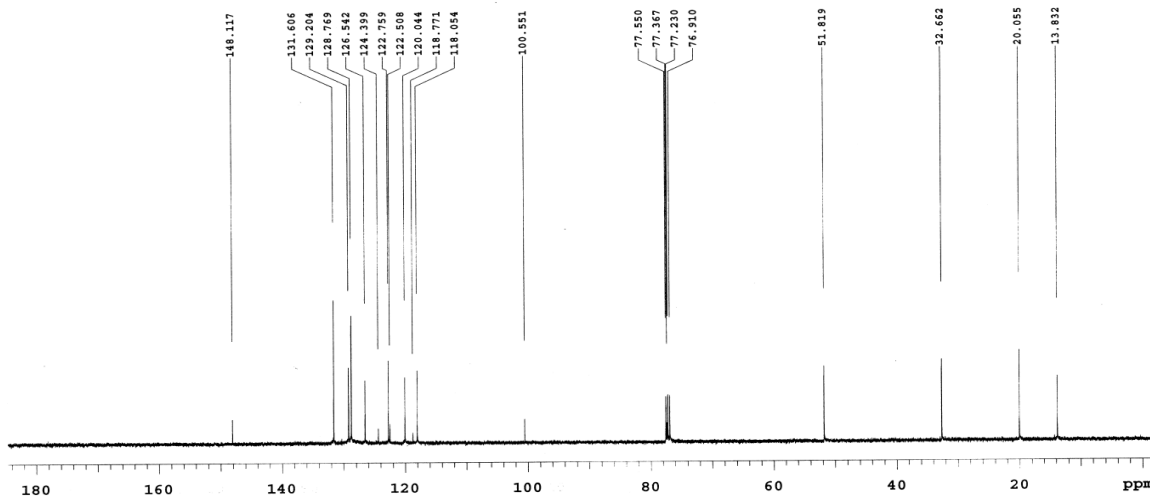

|                        |                                  |                        |                        |
|------------------------|----------------------------------|------------------------|------------------------|
| <b>PULSE SEQUENCE</b>  | <b>OBSERVE</b> GC13, 100.5425855 | <b>DATA PROCESSING</b> | <b>AUXIZPHNB-13C</b>   |
| Relax. delay 1.000 sec | <b>DECOUPLE</b> H1, 399.8529994  | Line broadening 0.5 Hz | Solvent: cdc13         |
| Pulse 45.0 degrees     | Power: 42 dB                     | FT size 65536          | Temp. 25.0 C / 298.1 K |
| Acq. time 1.304 sec    | continuously on                  | Total time 26 minutes  | Operator: chem         |
| Width 25125.6 Hz       | WALTZ-16 modulated               |                        | File: AU-13PHNB-13C    |
| 680 repetitions        |                                  |                        | Mercury-400 "IITG-NMR" |

$^1\text{H}$ ,  $^{13}\text{C}$  and  $^{19}\text{F}$  spectra of compound **4r**

AU-IZ-NBCF-PHM-1H

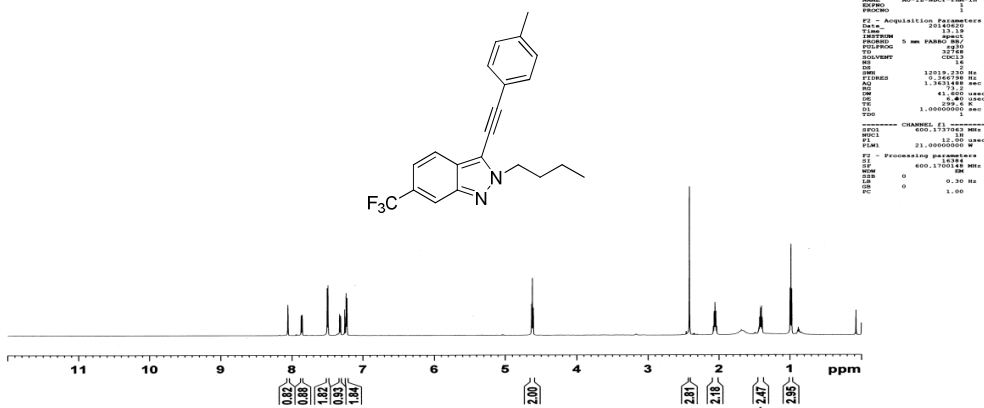

```

Current Data Parameters
NAME AU-IZ-NBCF-PHM-1H
EXPNO 1
PROCNO 1
F2 - Acquisition Parameters
Date_ 20140101
Time 13:19
INSTRUM spect
PROBHD 5 mm PABBO BB
PULPROG zgpg30
TD 65536
SOLVENT CDCl3
NS 1550
DS 2
SWH 36051.693 Hz
FIDRES 1.100383 Hz
AQ 0.4443229 sec
RG 327.64
DE 13.86 usec
TE 301.2 K
D1 2.0000000 sec
D11 0.0300000 sec
TDO 1
===== CHANNEL f1 =====
NUC1 13C
P1 10.50 usec
PL1 0.0000000 W
===== CHANNEL f2 =====
NUC2 1H
CPDPRG2 waltz16
PCPD2 21.0000000 W
PLM2 0.4371400 W
PLM3 0.30239999 W
F2 - Processing parameters
SI 6384
SF 150.912836 MHz
WDW EM
SSB 0
LB 1.00 Hz
GB 0
PC 1.00
    
```

AU-NB-CF3-SP-Ph\_13C

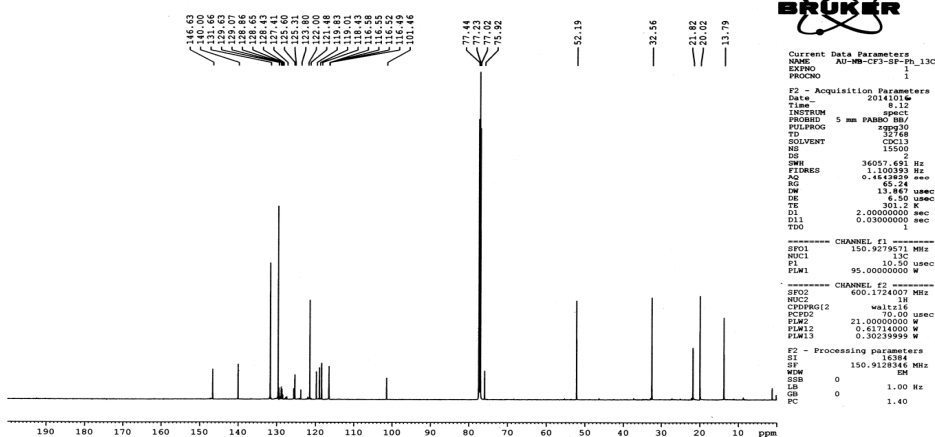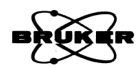

```

Current Data Parameters
NAME AU-NB-CF3-SP-Ph_13C
EXPNO 1
PROCNO 1
F2 - Acquisition Parameters
Date_ 20140101
Time 8:12
INSTRUM spect
PROBHD 5 mm PABBO BB
PULPROG zgpg30
TD 65536
SOLVENT CDCl3
NS 1550
DS 2
SWH 36051.693 Hz
FIDRES 1.100383 Hz
AQ 0.4443229 sec
RG 327.64
DE 13.86 usec
TE 301.2 K
D1 2.0000000 sec
D11 0.0300000 sec
TDO 1
===== CHANNEL f1 =====
NUC1 13C
P1 10.50 usec
PL1 0.0000000 W
===== CHANNEL f2 =====
NUC2 1H
CPDPRG2 waltz16
PCPD2 21.0000000 W
PLM2 0.4371400 W
PLM3 0.30239999 W
F2 - Processing parameters
SI 6384
SF 150.912836 MHz
WDW EM
SSB 0
LB 1.00 Hz
GB 0
PC 1.40
    
```

AU-IZ-NB-CF-PHMOR

```

Sample Name:
Data Collected on:
1770 MHz spectscopy00
Archive directory:
Sample directory:
P1dfile: FLDORINE
Pulse Sequence: FLDORINE (s2pul)
Solvent: cdcl3
Data collected on: Jul 10 2014
Temp: 25.0 C / 298.1 K
Operator: oham
Relax. delay: 1.000 sec
Pulse 30.0 degree
Acq. time 0.742 sec
Width 86204.9 Hz
25 equillibrons
OBSERVE F1: 376.1749614 MHz
DATA PROCESSING
PT size 131072
Total time 1 min 59 sec
    
```

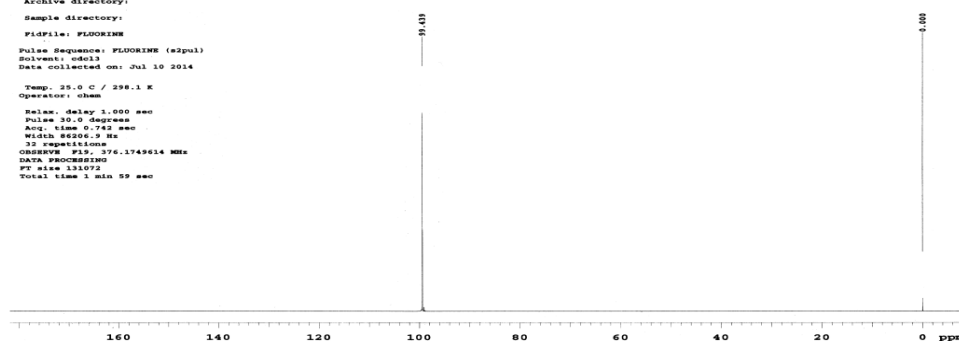

<sup>1</sup>H and <sup>13</sup>C spectra of compound 4s

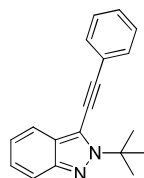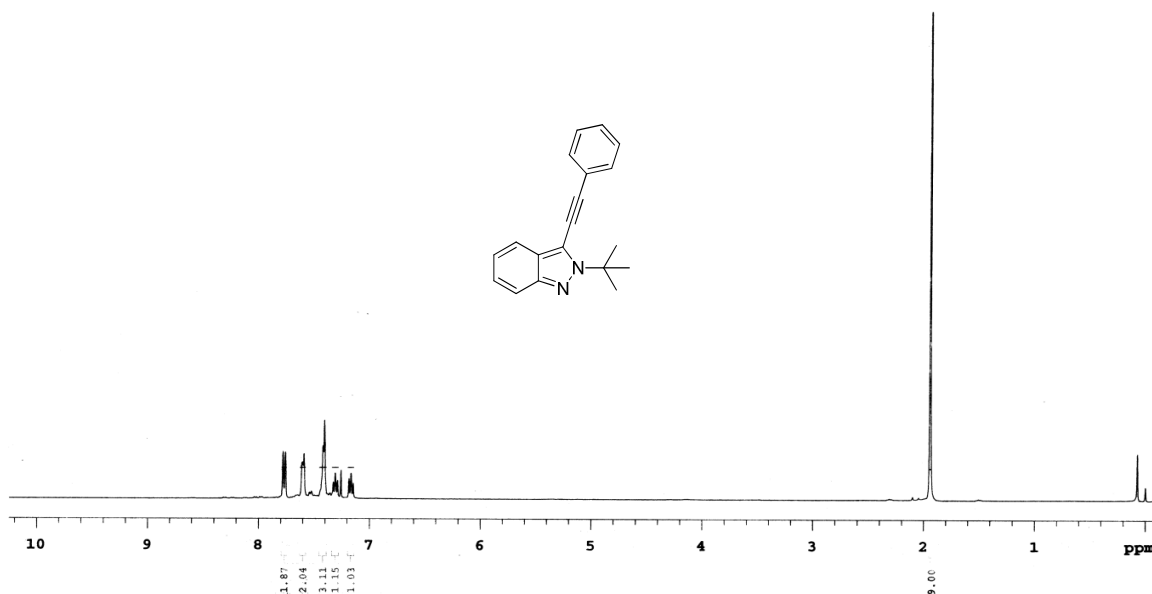

|                                                                                                                                   |                                                                                                                                 |                                                                 |                                                                                                                                           |
|-----------------------------------------------------------------------------------------------------------------------------------|---------------------------------------------------------------------------------------------------------------------------------|-----------------------------------------------------------------|-------------------------------------------------------------------------------------------------------------------------------------------|
| <b>PULSE SEQUENCE</b><br>Relax: delay 1.000 sec<br>Pulse 45.0 degree#<br>Acq. time 2.561 sec<br>Width 6398.0 Hz<br>22 repetitions | <b>OBSERVE</b> <sup>1</sup> H, 399.8529994<br>DECOUPLE H1, 399.8529994<br>Power: 42 dB<br>continuously on<br>WALTZ-16 modulated | <b>DATA PROCESSING</b><br>FT size 32768<br>Total time 1 minutes | <b>AU-IZCF-PHMR-13C</b><br>Solvent: cdcl3<br>Temp: 25.0 C / 298.1 K<br>Operator: chem<br>File: AU-IZCF-PHMR-H11<br>Mercury-400 *IITG-NMR* |
|-----------------------------------------------------------------------------------------------------------------------------------|---------------------------------------------------------------------------------------------------------------------------------|-----------------------------------------------------------------|-------------------------------------------------------------------------------------------------------------------------------------------|

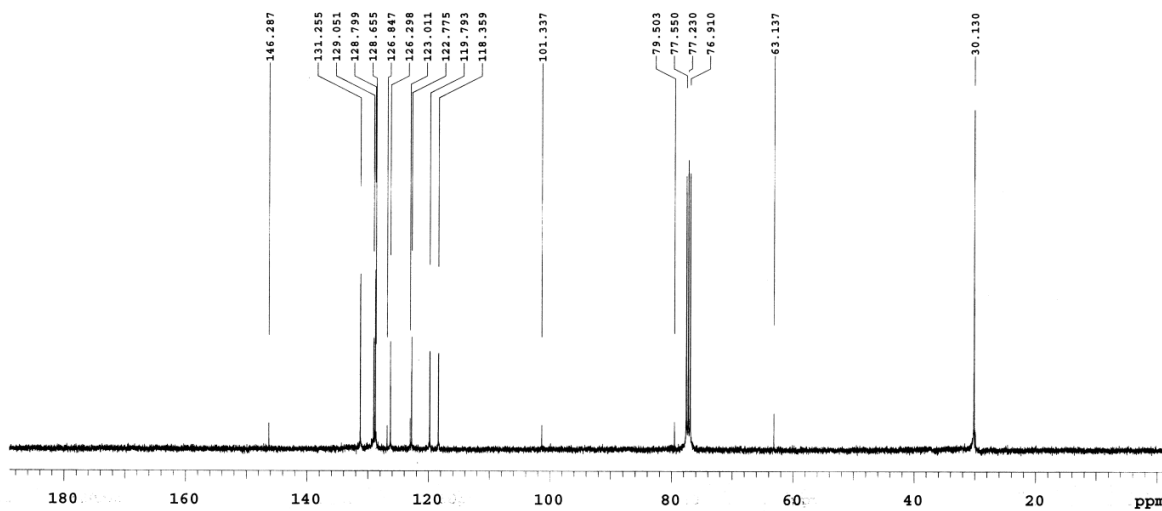

|                                                                                                                                      |                                                                                                                                  |                                                                                           |                                                                                                                                         |
|--------------------------------------------------------------------------------------------------------------------------------------|----------------------------------------------------------------------------------------------------------------------------------|-------------------------------------------------------------------------------------------|-----------------------------------------------------------------------------------------------------------------------------------------|
| <b>PULSE SEQUENCE</b><br>Relax: delay 1.000 sec<br>Pulse 45.0 degree#<br>Acq. time 1.304 sec<br>Width 25125.6 Hz<br>6040 repetitions | <b>OBSERVE</b> <sup>13</sup> C, 100.5425824<br>DECOUPLE H1, 399.8529994<br>Power: 42 dB<br>continuously on<br>WALTZ-16 modulated | <b>DATA PROCESSING</b><br>Line broadening 0.5 Hz<br>FT size 65536<br>Total time 3.9 hours | <b>AU-IZ-TB-Ph_13C</b><br>Solvent: cdcl3<br>Temp: 25.0 C / 298.1 K<br>Operator: chem<br>File: AU-IZ-TB-Ph_13C<br>Mercury-400 *IITG-NMR* |
|--------------------------------------------------------------------------------------------------------------------------------------|----------------------------------------------------------------------------------------------------------------------------------|-------------------------------------------------------------------------------------------|-----------------------------------------------------------------------------------------------------------------------------------------|

$^1\text{H}$  and  $^{13}\text{C}$  spectra of compound **4t**

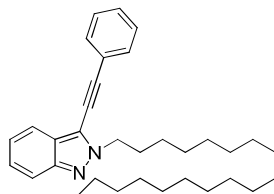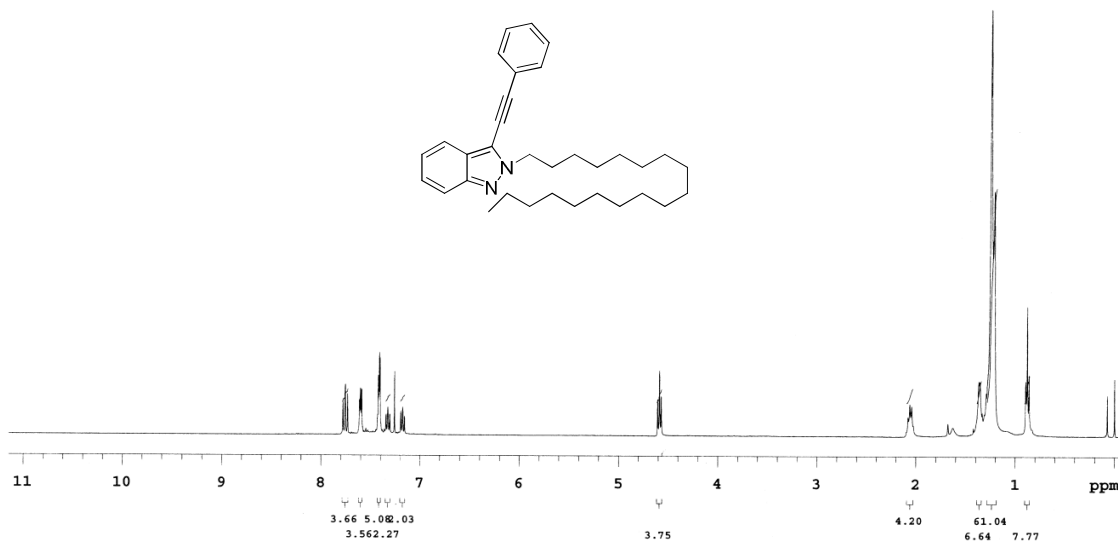

|                        |                                          |                        |                        |
|------------------------|------------------------------------------|------------------------|------------------------|
| <b>PULSE SEQUENCE</b>  | <b>OBSERVE:</b> $^1\text{H}$ 399.8509625 | <b>DATA PROCESSING</b> | <b>AU-IZOCTPH-H1</b>   |
| Relax. delay 1.000 sec |                                          | FT size 32768          | Solvent: cdcl3         |
| Pulse 45.0 degrees     |                                          | Total time 1 minutes   | Temp: 25.0 C / 298.1 K |
| Acq. time 2.561 sec    |                                          |                        | Operator: chem         |
| Width 6398.0 Hz        |                                          |                        | Mercury-400 "IITG-NMR" |
| 32 repetitions         |                                          |                        |                        |

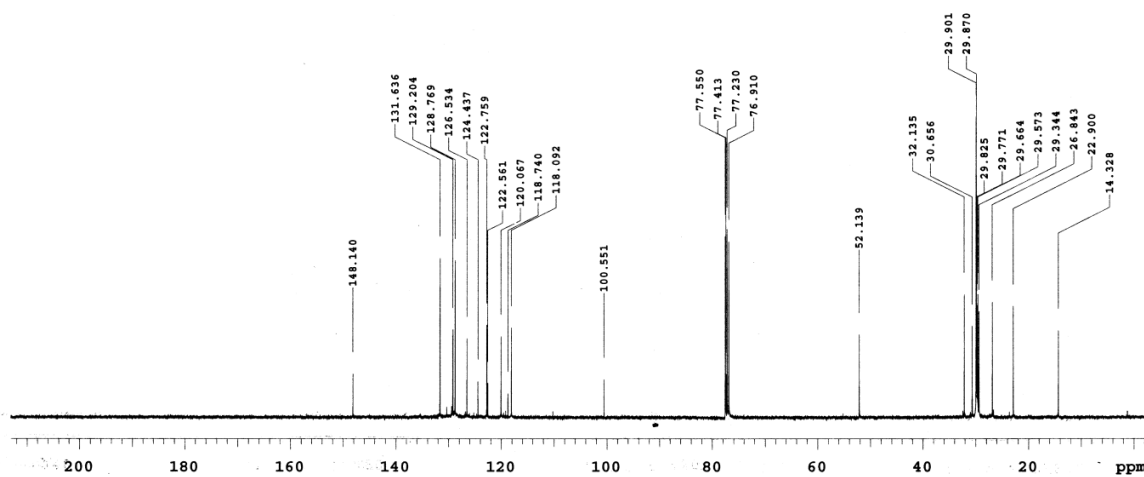

|                        |                                             |                        |                        |
|------------------------|---------------------------------------------|------------------------|------------------------|
| <b>PULSE SEQUENCE</b>  | <b>OBSERVE:</b> $^{13}\text{C}$ 100.5425832 | <b>DATA PROCESSING</b> | <b>AU-IZOCTPH-13C</b>  |
| Relax. delay 1.000 sec | <b>DECOUPLE:</b> $^1\text{H}$ 399.8529994   | Line broadening 0.5 Hz | Solvent: cdcl3         |
| Pulse 45.0 degrees     | Power 42 dB                                 | FT size 65536          | Temp: 25.0 C / 298.1 K |
| Acq. time 1.304 sec    | <b>PROBHD:</b> cpdpr131                     | Total time 86 minutes  | Operator: chem         |
| Width 25125.6 Hz       | <b>PROBHD:</b> WALTZ-16 modulated           |                        | File: AU_17_06_08_13C  |
| 2280 repetitions       |                                             |                        | Mercury-400 "IITG-NMR" |

The crystal parameters of compound **4a**

|                                                     | <b>4a- CCDC1008821</b>                                        |
|-----------------------------------------------------|---------------------------------------------------------------|
| Formula                                             | C <sub>25</sub> H <sub>22</sub> N <sub>2</sub> O <sub>2</sub> |
| Formula weight                                      | 382.45                                                        |
| <i>T</i> /K                                         | 296(2)                                                        |
| Crystal system                                      | Orthorhombic                                                  |
| Space group                                         | P2(1)2(1)2(1)                                                 |
| <i>a</i> /Å                                         | 5.1346(2)                                                     |
| <i>b</i> /Å                                         | 15.0120(4)                                                    |
| <i>c</i> /Å                                         | 26.4598(7)                                                    |
| <i>α</i> <sup>o</sup>                               | 90.00                                                         |
| <i>β</i> <sup>o</sup>                               | 90.00                                                         |
| <i>γ</i> <sup>o</sup>                               | 90.00                                                         |
| <i>V</i> /Å <sup>3</sup>                            | 2039.54(11)                                                   |
| <i>Z</i>                                            | 4                                                             |
| Abs. Coeff./mm <sup>-1</sup>                        | 0.080                                                         |
| Abs. Correction                                     | Multi-scan                                                    |
| GOF on <i>F</i> <sup>2</sup>                        | 1.299                                                         |
| Final <i>R</i> indices [ <i>I</i> > 2σ( <i>I</i> )] | <i>R</i> 1 = 0.0335<br><i>wR</i> 2 = 0.0707                   |
| <i>R</i> indices [all data]                         | <i>R</i> 1 = 0.0371<br><i>wR</i> 2 = 0.0719                   |

ORTEP diagram of **4a**

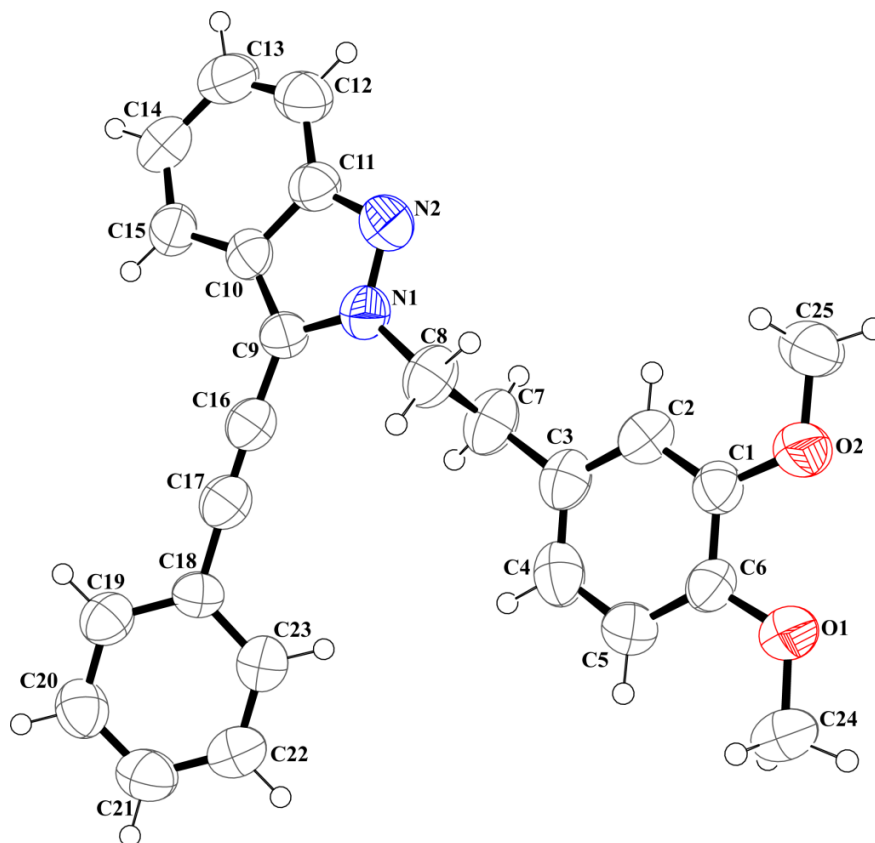

Supplement: c4ra10093j1.pdf [file c4ra10093j1.pdf]
