# Supplementary material for: Regioselective one-pot, three-component synthesis of substituted 2H-indazoles from 2-nitroarylaldehyde, alkyne and amine catalyzed by the CuBr/Zn(OTf)2 system
Source: Royal Society of Chemistry journal article supplement (doi:10.1039/c4ra10093j), 2014-01-01

**Supporting Information for Publication**

**Regioselective One-Pot, Three-Component Synthesis of Substituted 2*H*-Indazoles from 2-Nitroarylaldehyde, Alkyne and Amine Catalyzed by CuBr/Zn(OTf)<sub>2</sub> System**

Anil K. Saikia,<sup>\*a</sup> Ramanjaneyulu Unnava,<sup>a</sup> Kiran Indukuri<sup>a</sup> and Sujit Sarkar<sup>a</sup>

Contents:

- |                                  |               |
|----------------------------------|---------------|
| 1. HRMS Spectra of all compounds | <b>S2-S11</b> |
|----------------------------------|---------------|

## HRMS spectrum of compound 4a

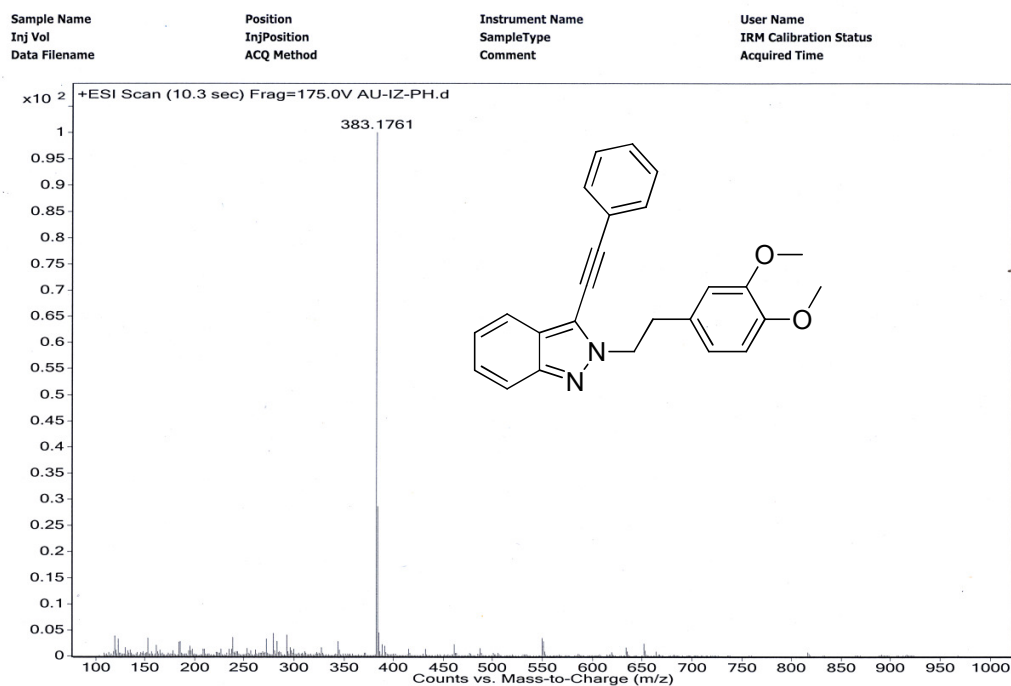

## HRMS spectrum of compound 4b

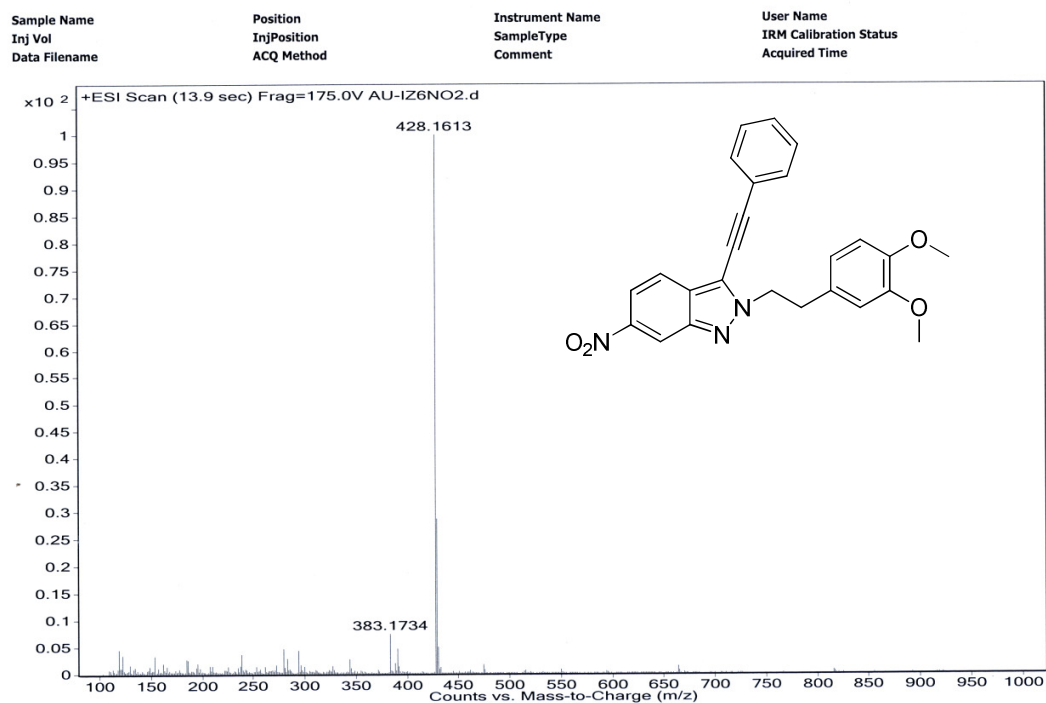

### HRMS spectrum of compound 4c

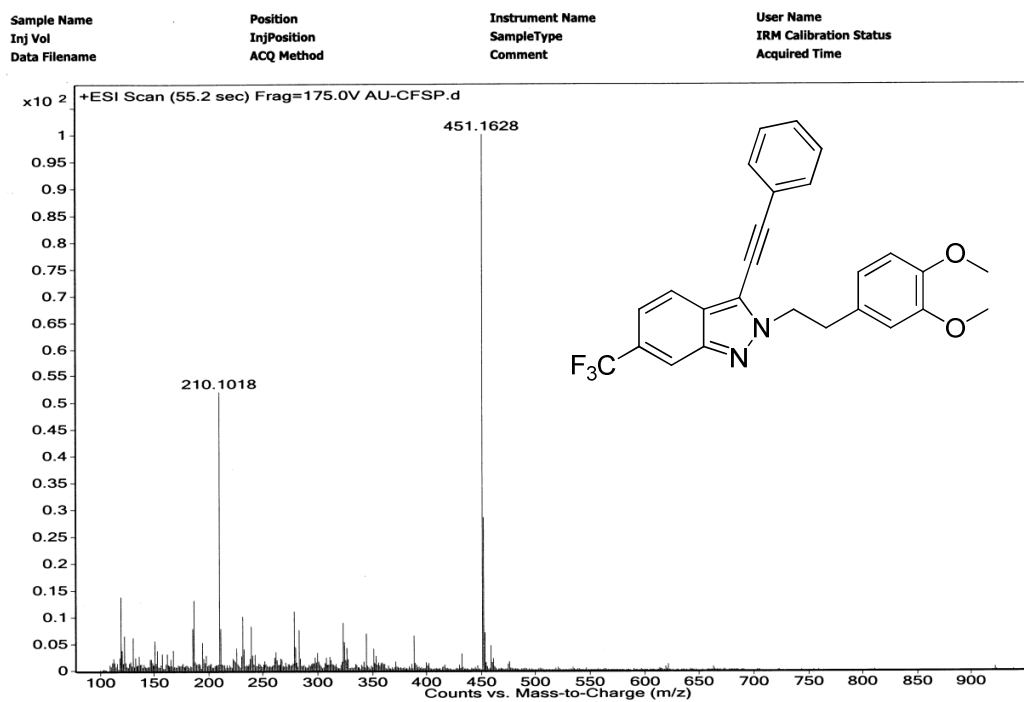

### HRMS spectrum of compound 4d

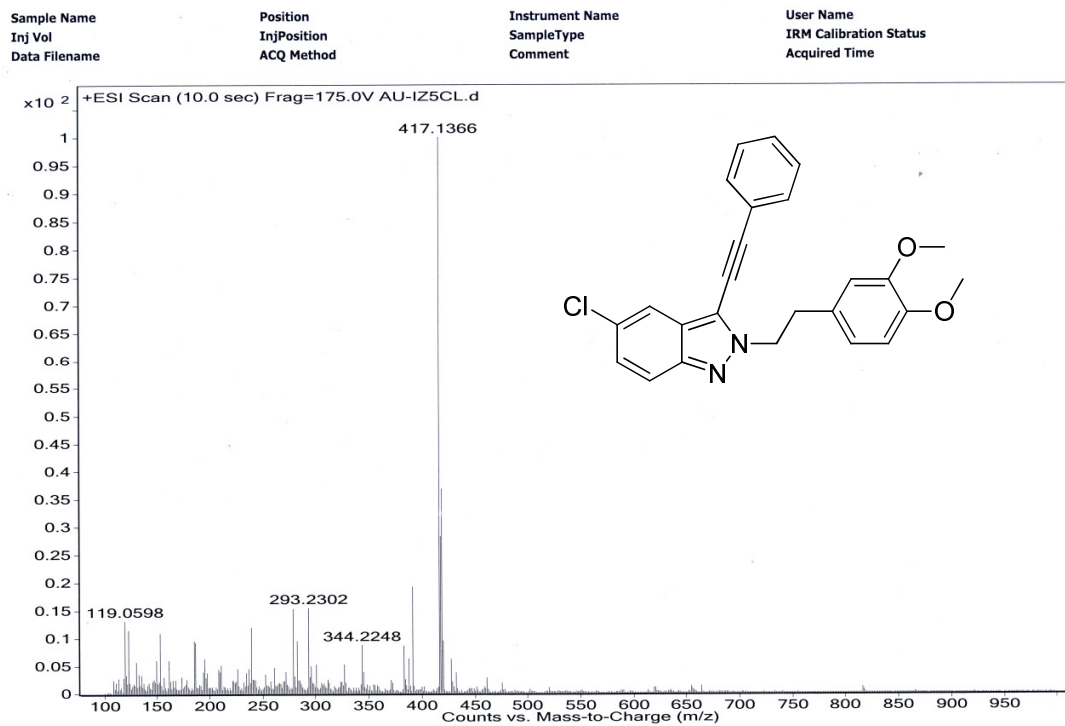

### HRMS spectrum of compound 4e

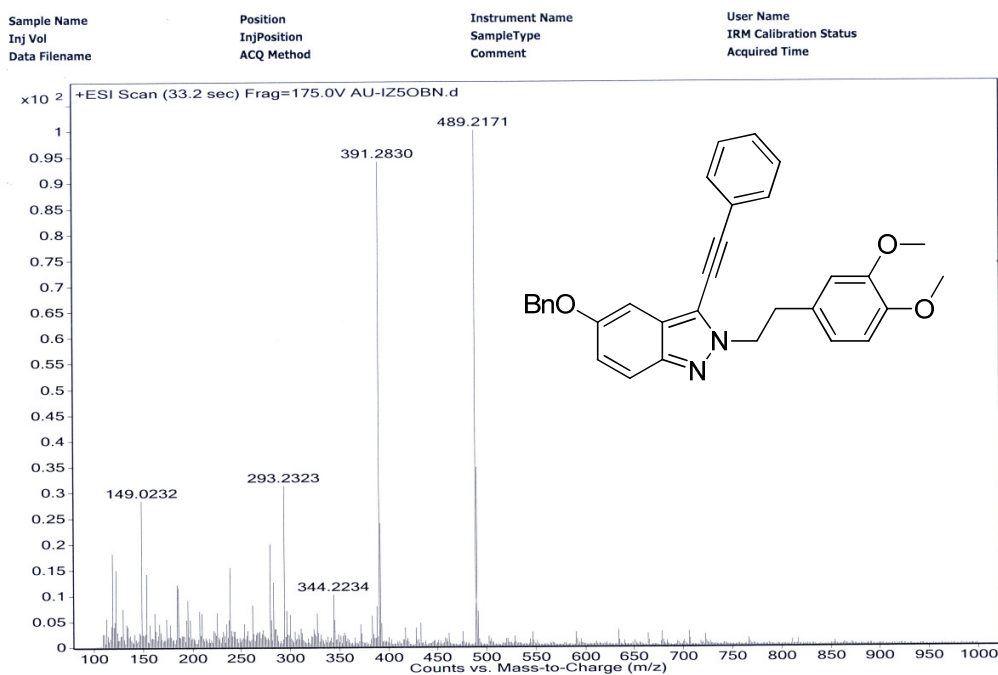

### HRMS spectrum of compound 4f

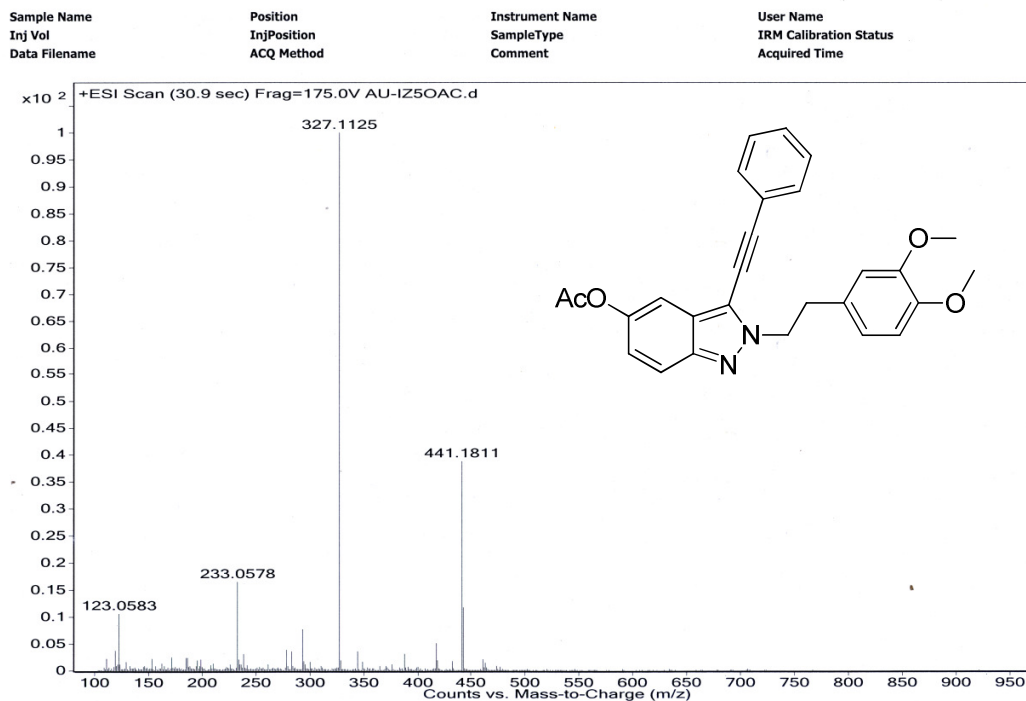

## HRMS spectrum of compound 4g

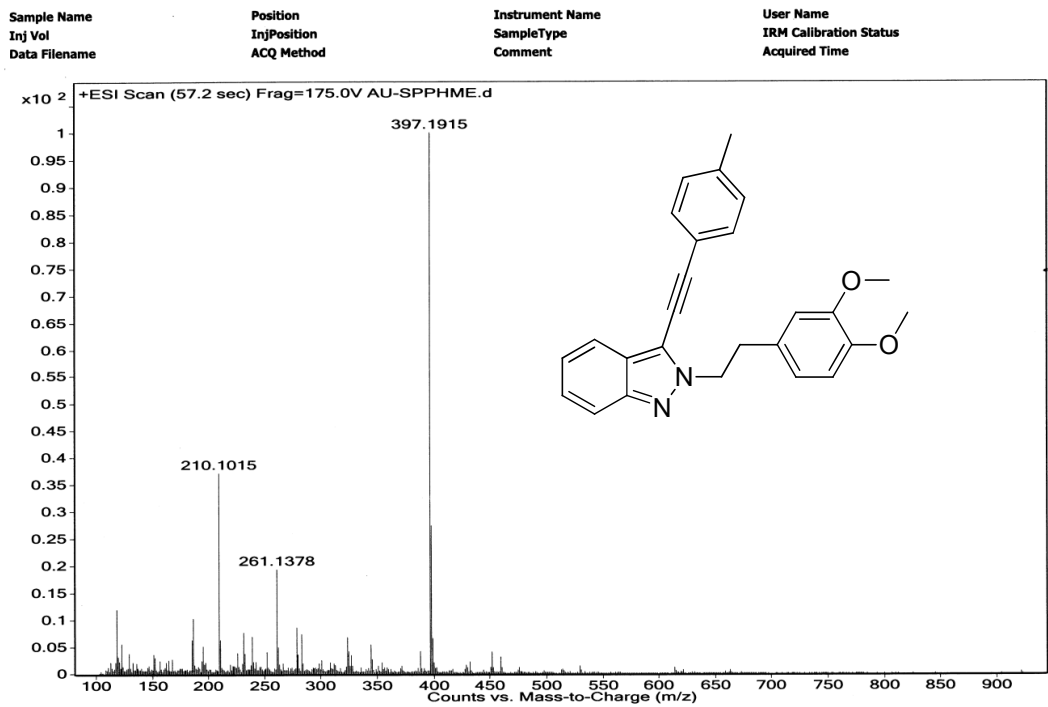

## HRMS spectrum of compound 4h

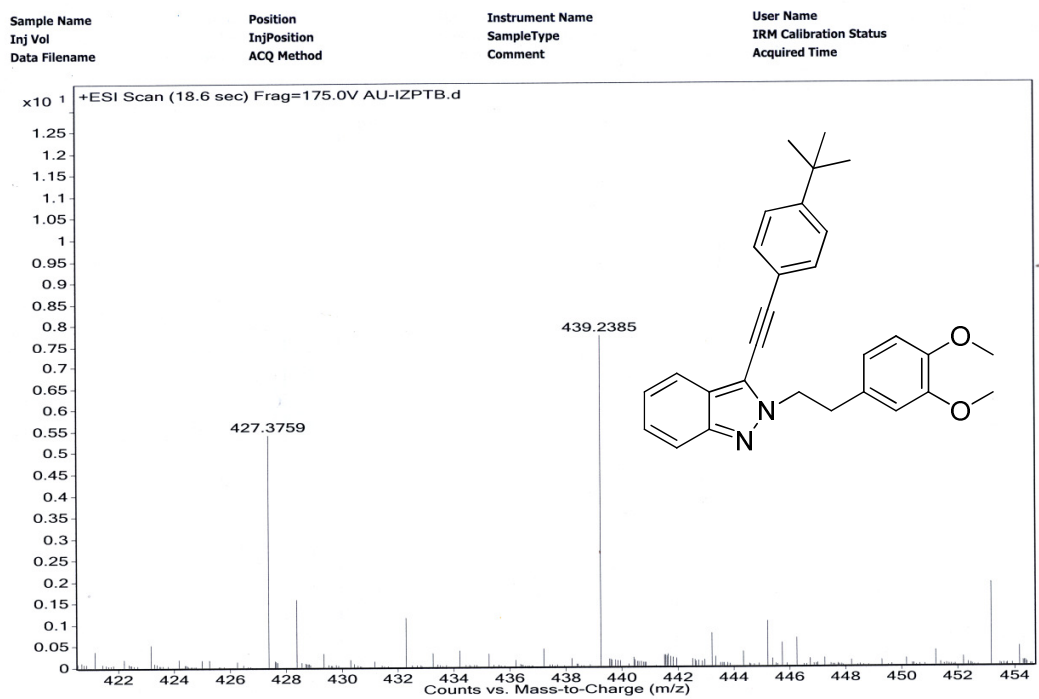

## HRMS spectrum of compound 4i

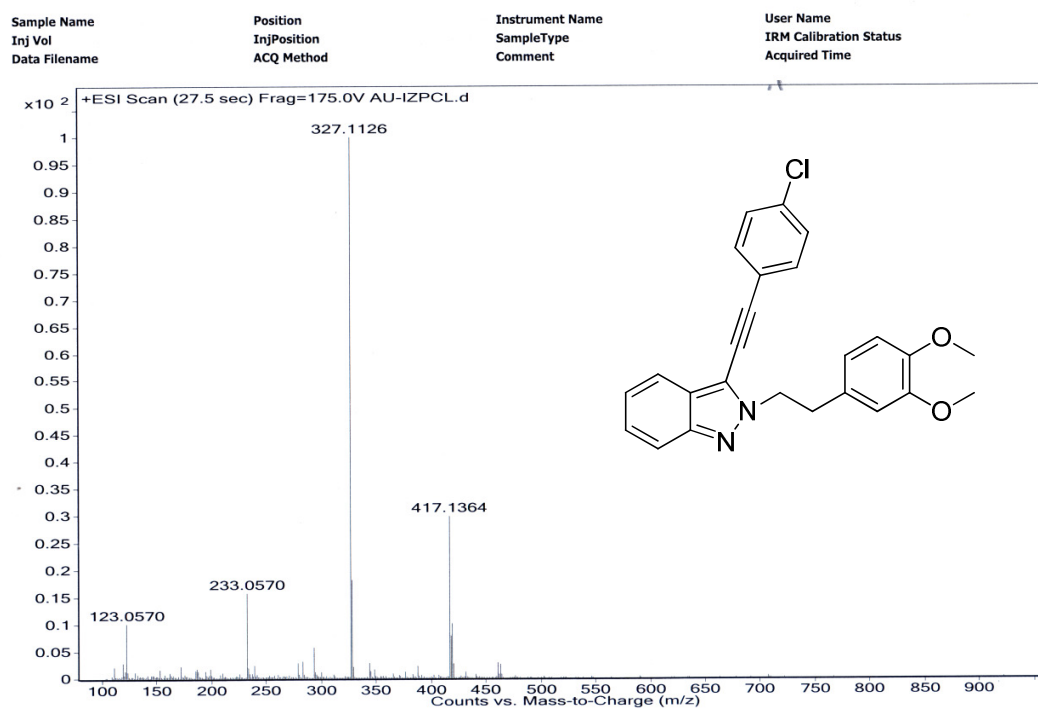

## HRMS spectrum of compound 4j

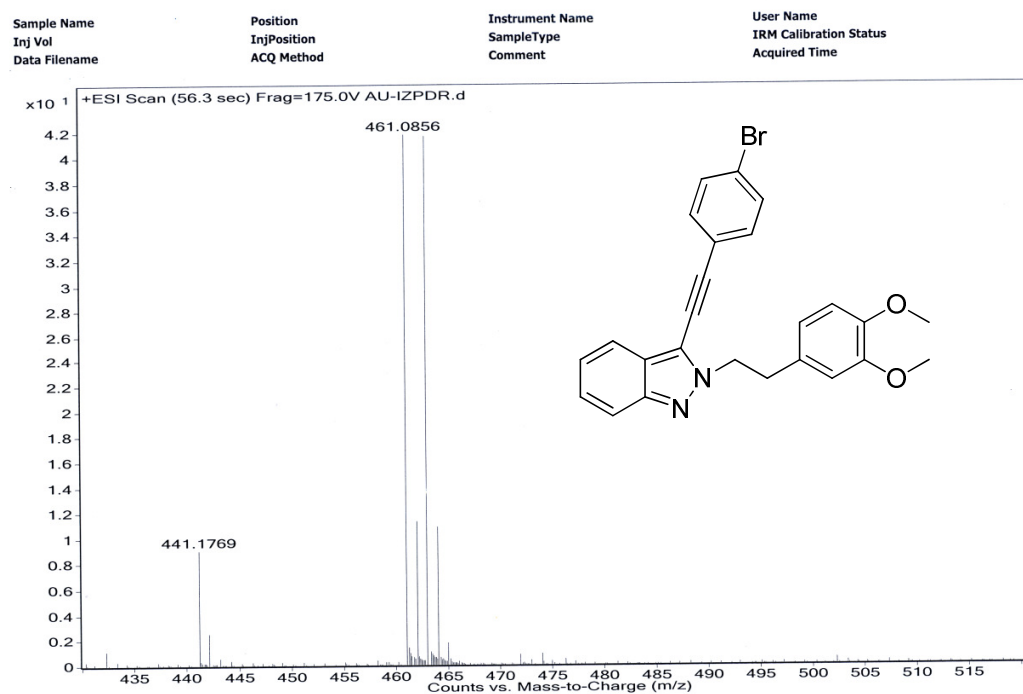

### HRMS spectrum of compound 4k

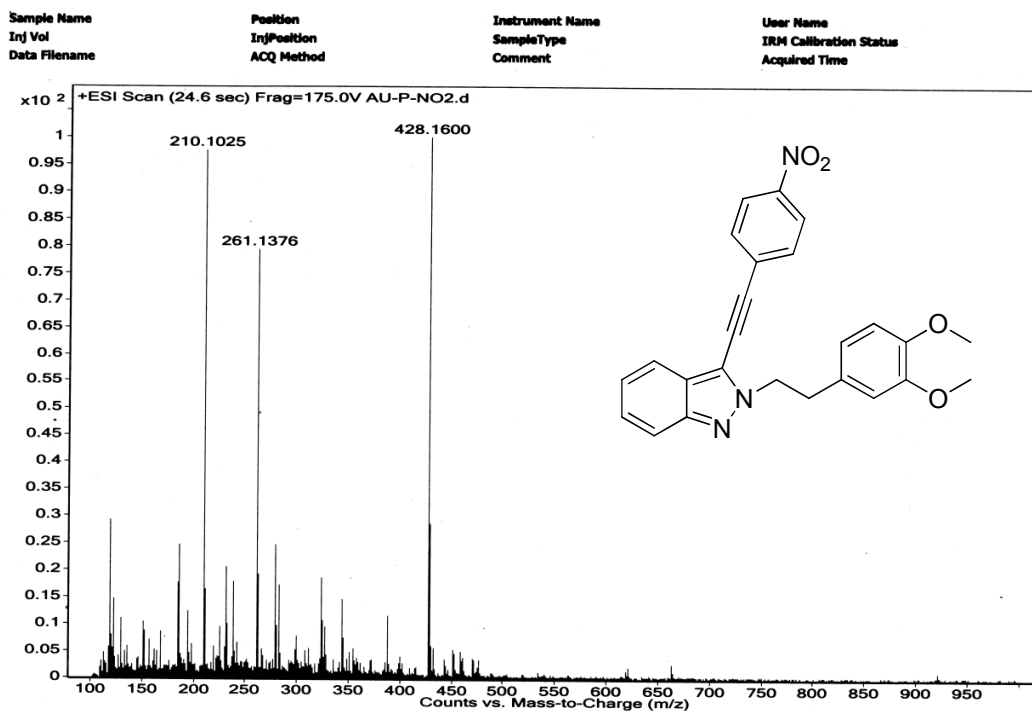

### HRMS spectrum of compound 4l

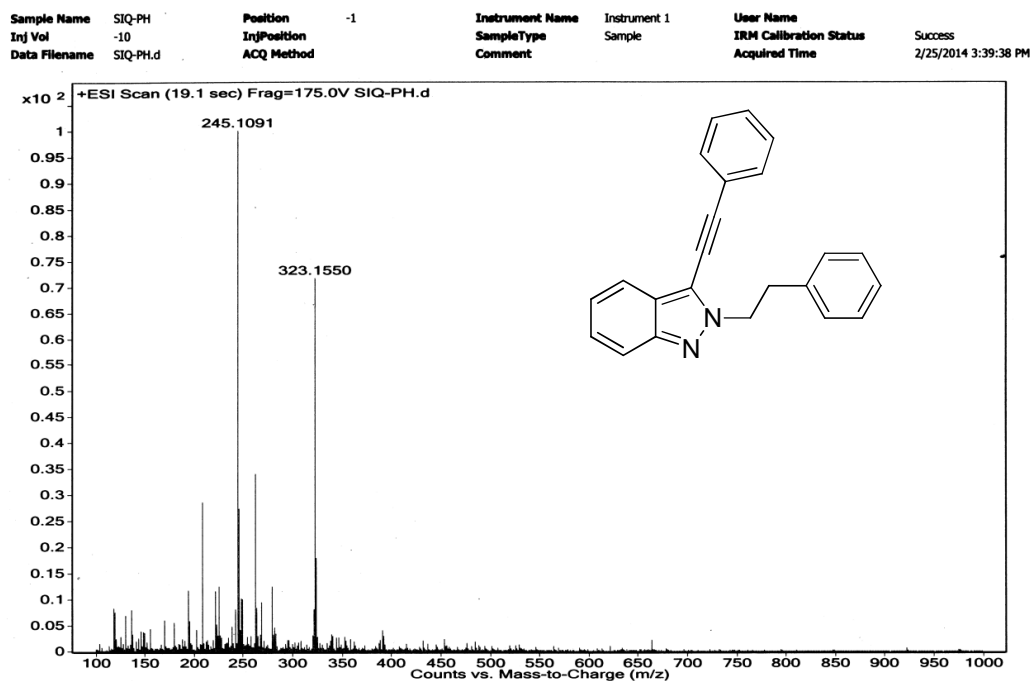

### HRMS spectrum of compound 4m

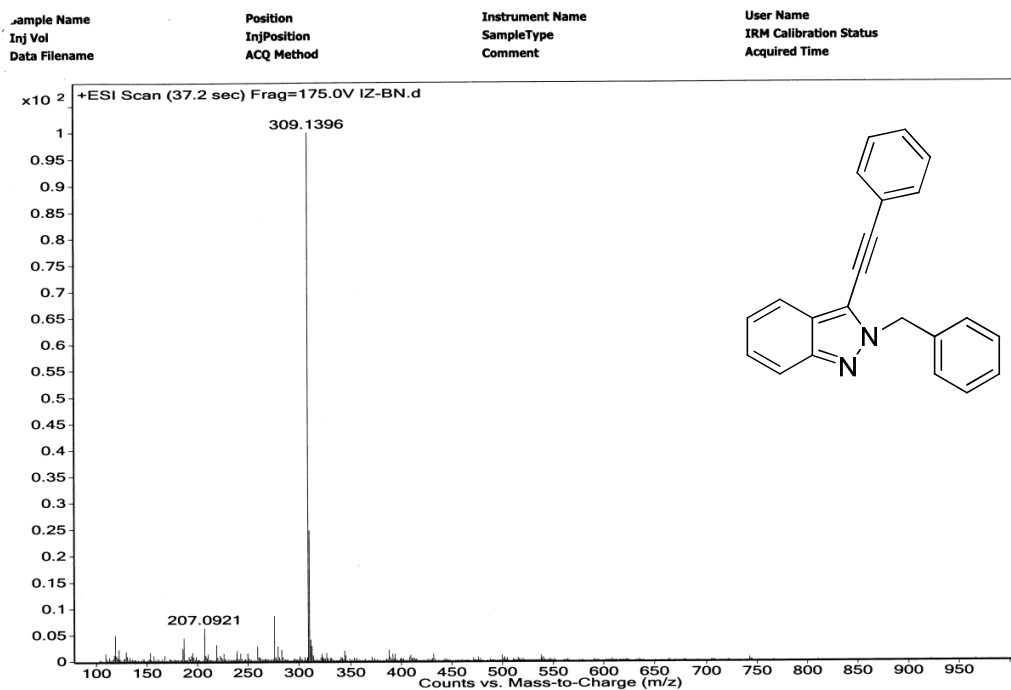

### HRMS spectrum of compound 4n

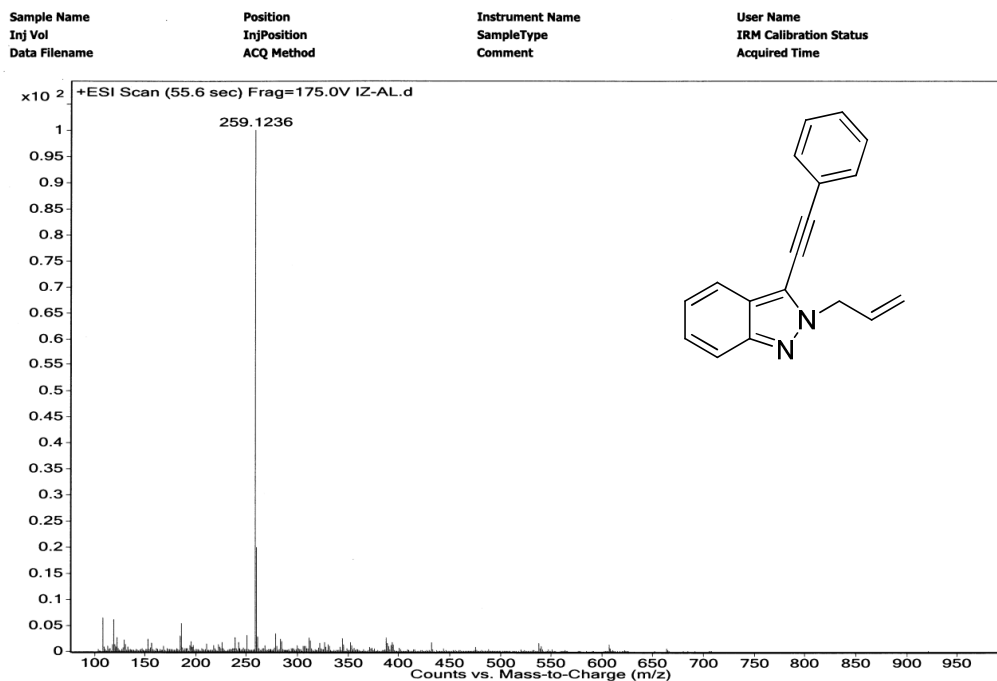



### HRMS spectrum of compound 4o

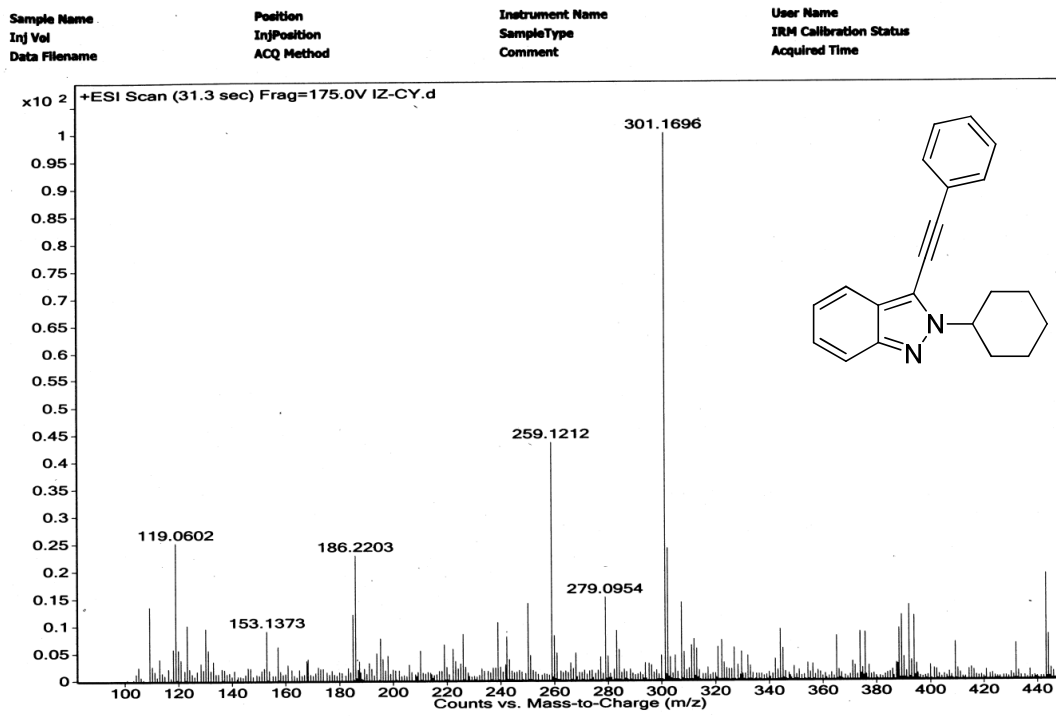

### HRMS spectrum of compound 4p

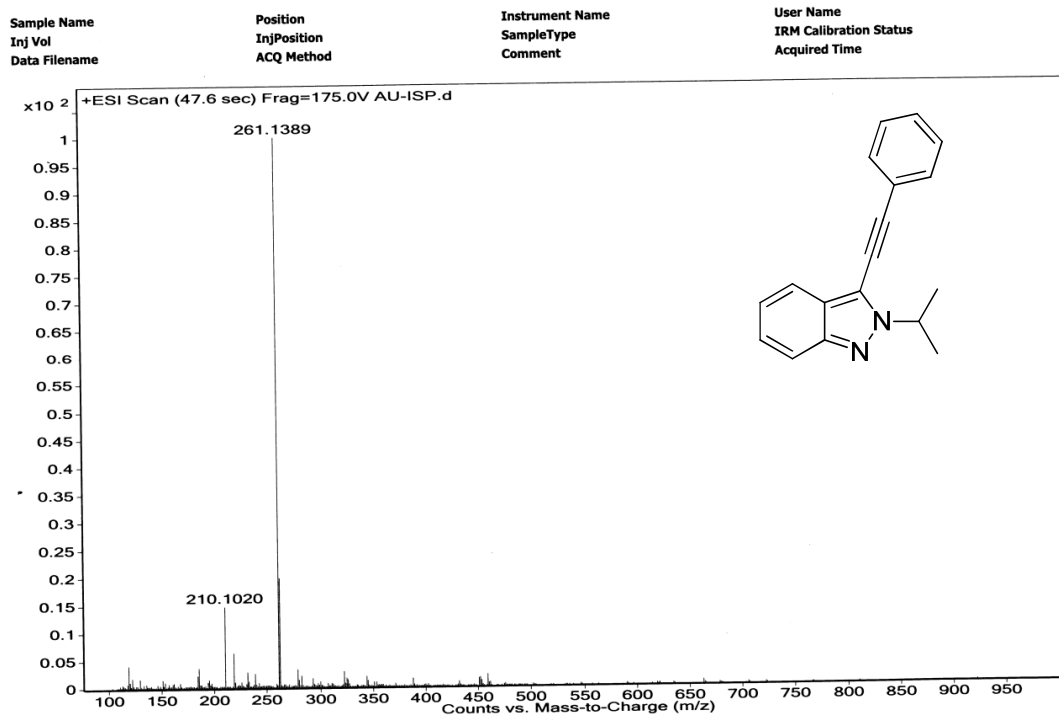

## HRMS spectrum of compound 4q

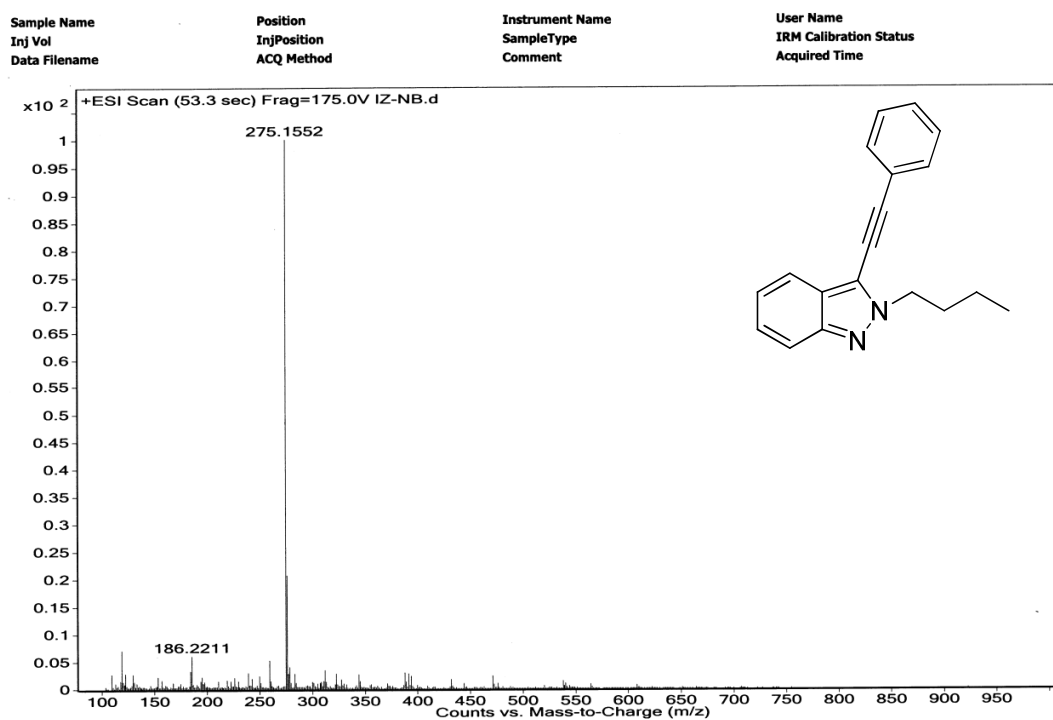

## HRMS spectra of compound 4r

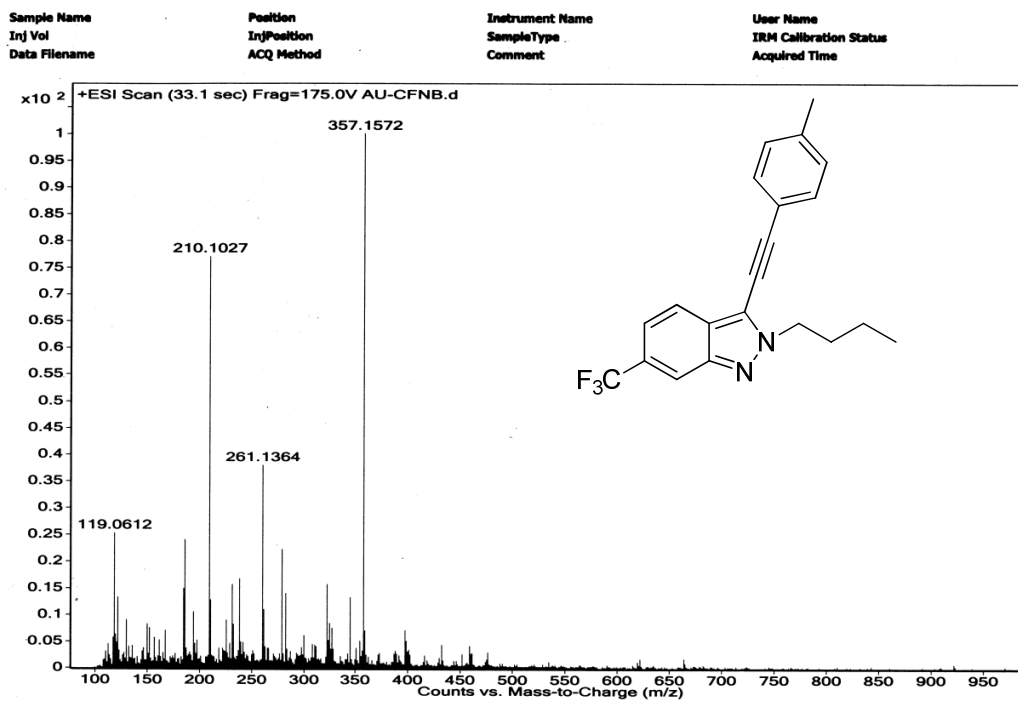

### HRMS spectrum of compound 4s

| Sample Name   | Position    | Instrument Name | User Name              |
|---------------|-------------|-----------------|------------------------|
| Inj Vol       | InjPosition | SampleType      | IRM Calibration Status |
| Data Filename | ACQ Method  | Comment         | Acquired Time          |

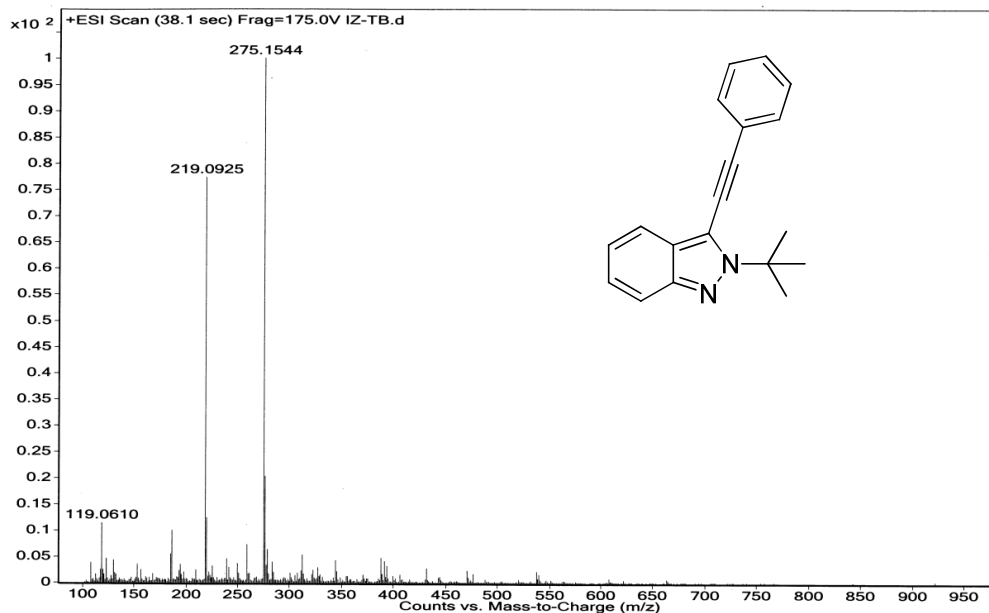

### HRMS spectrum of compound 4t

| Sample Name   | Position    | Instrument Name | User Name              |
|---------------|-------------|-----------------|------------------------|
| Inj Vol       | InjPosition | SampleType      | IRM Calibration Status |
| Data Filename | ACQ Method  | Comment         | Acquired Time          |

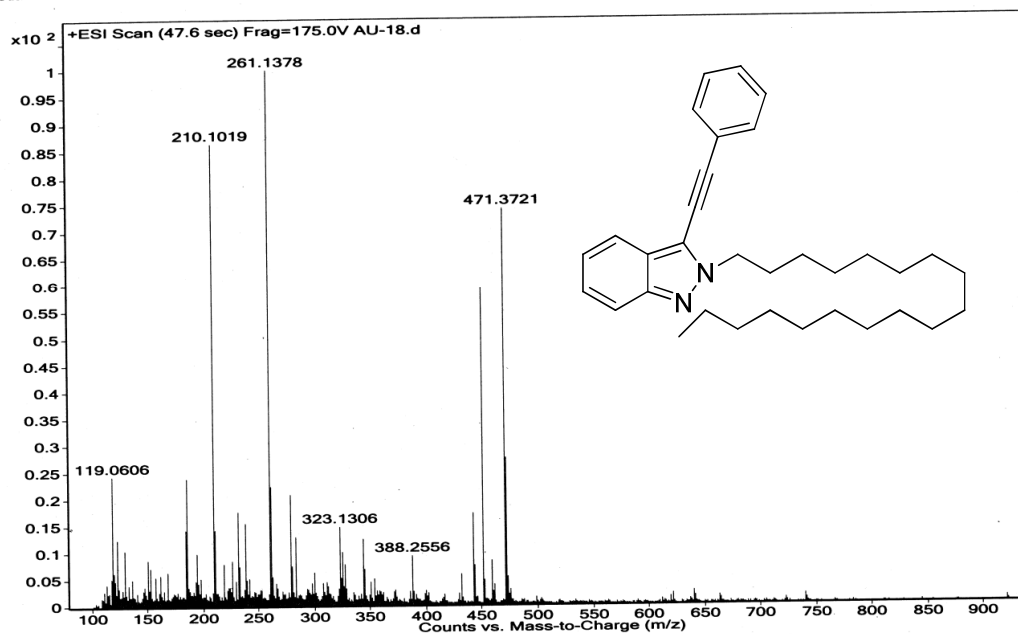

Supplement: c4ra10093j2.pdf [file c4ra10093j2.pdf]
